# Supplementary material
Source: PubMed Central journal article supplement (PMC4826480)
Supplement: NIHMS765458-supplement-1.pdf [file NIHMS765458-supplement-1.pdf]

Legend:

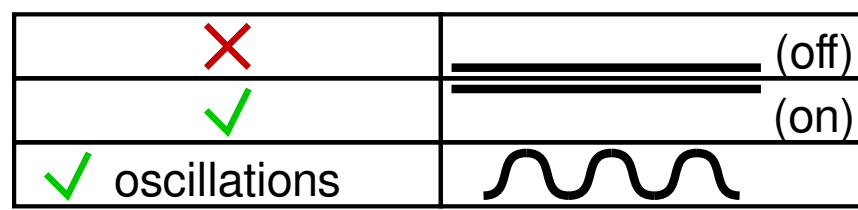

A

*clnΔ\* clbΔ\**

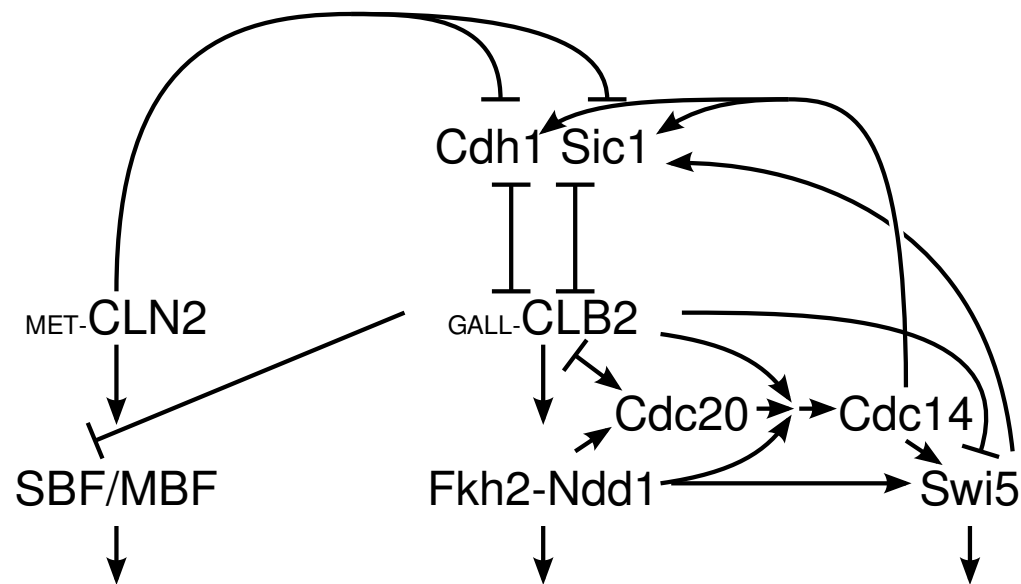

| MET-CLN2 | GALL-CLB2 | Start cluster | CLB2 cluster | Swi5 cluster |
|----------|-----------|---------------|--------------|--------------|
|----------|-----------|---------------|--------------|--------------|

CDK-APC/C-only model:

|     |     |                              |                              |                              |
|-----|-----|------------------------------|------------------------------|------------------------------|
| off | off | ✗                            | ✗                            | ✗                            |
| on  | off | ✓                            | ✗                            | ✗                            |
| off | on  | ✗                            | ✗                            | ✗                            |
| on  | on  | ✓ oscillations?<br>constant? | ✓ oscillations?<br>constant? | ✓ oscillations?<br>constant? |

Global transcriptional oscillator:

|     |     |                |                |                |
|-----|-----|----------------|----------------|----------------|
| off | off | ✓ oscillations | ✓ oscillations | ✓ oscillations |
| on  | off | ✓ oscillations | ✓ oscillations | ✓ oscillations |
| off | on  | ✓ oscillations | ✓ oscillations | ✓ oscillations |
| on  | on  | ✓ oscillations | ✓ oscillations | ✓ oscillations |

This study:

|     |     |                |                |                |
|-----|-----|----------------|----------------|----------------|
| off | off | ✗              | ✗              | ✗              |
| on  | off | ✓              | ✗              | ✓ oscillations |
| off | on  | ✗              | ✗              | ✗              |
| on  | on  | ✓ oscillations | ✓ oscillations | ✓ oscillations |

B

*cdc20Δ MET-CDC20 GAL1-CLB2kd*

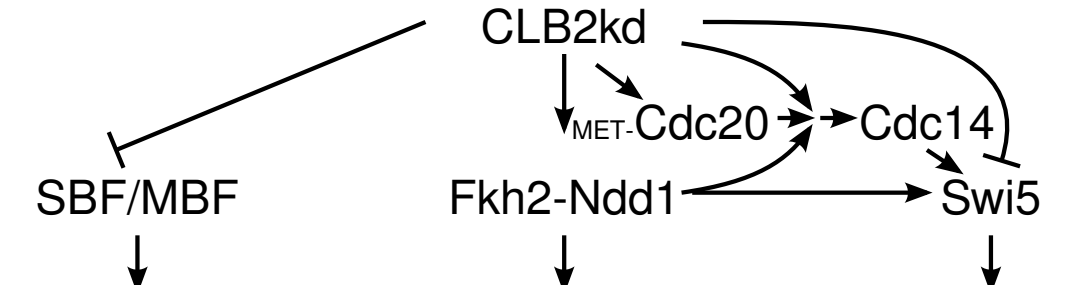

| MET-CDC20 | GAL1-CLB2kd | Start cluster | CLB2 cluster | Swi5 cluster |
|-----------|-------------|---------------|--------------|--------------|
|-----------|-------------|---------------|--------------|--------------|

CDK-APC/C-only model:

|    |         |   |   |   |
|----|---------|---|---|---|
| on | induced | ✗ | ✓ | ? |
|----|---------|---|---|---|

Global transcriptional oscillator (predictions based on results for *cdc20Δ*):

|    |         |                                 |                |   |
|----|---------|---------------------------------|----------------|---|
| on | induced | ✓ oscillations<br>(some genes?) | ✓ oscillations | ✗ |
|----|---------|---------------------------------|----------------|---|

This study:

|    |         |          |          |                                      |
|----|---------|----------|----------|--------------------------------------|
| on | induced | ✗ (CLN2) | ✓ (CLB2) | ✓ oscillations<br>(SIC1, CYK3, CDC6) |
|----|---------|----------|----------|--------------------------------------|

C

*cdc20Δ MET-CDC20*

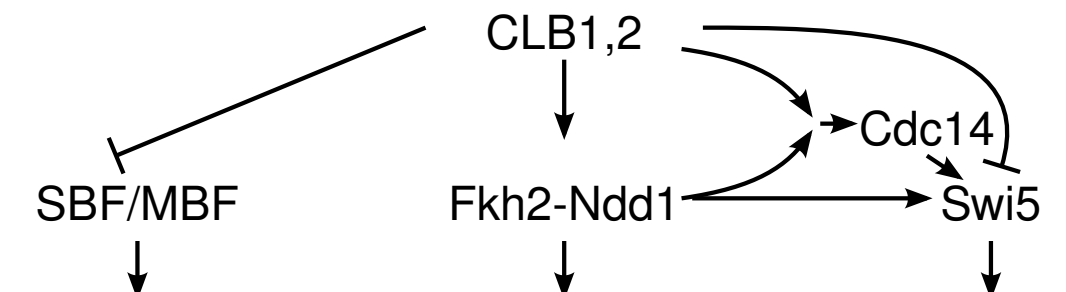

| MET-CDC20 | Start cluster | CLB2 cluster | Swi5 cluster |
|-----------|---------------|--------------|--------------|
|-----------|---------------|--------------|--------------|

CDK-APC/C-only model:

|     |   |   |   |
|-----|---|---|---|
| off | ✗ | ✓ | ? |
|-----|---|---|---|

Global transcriptional oscillator:

|     |                                 |                |   |
|-----|---------------------------------|----------------|---|
| off | ✓ oscillations<br>(some genes?) | ✓ oscillations | ✗ |
|-----|---------------------------------|----------------|---|

This study:

|     |          |          |                                      |
|-----|----------|----------|--------------------------------------|
| off | ✗ (CLN2) | ✓ (CLB2) | ✓ oscillations<br>(SIC1, CYK3, CDC6) |
|-----|----------|----------|--------------------------------------|
