# Supplementary material
Source: PubMed Central journal article supplement (PMC4826480)

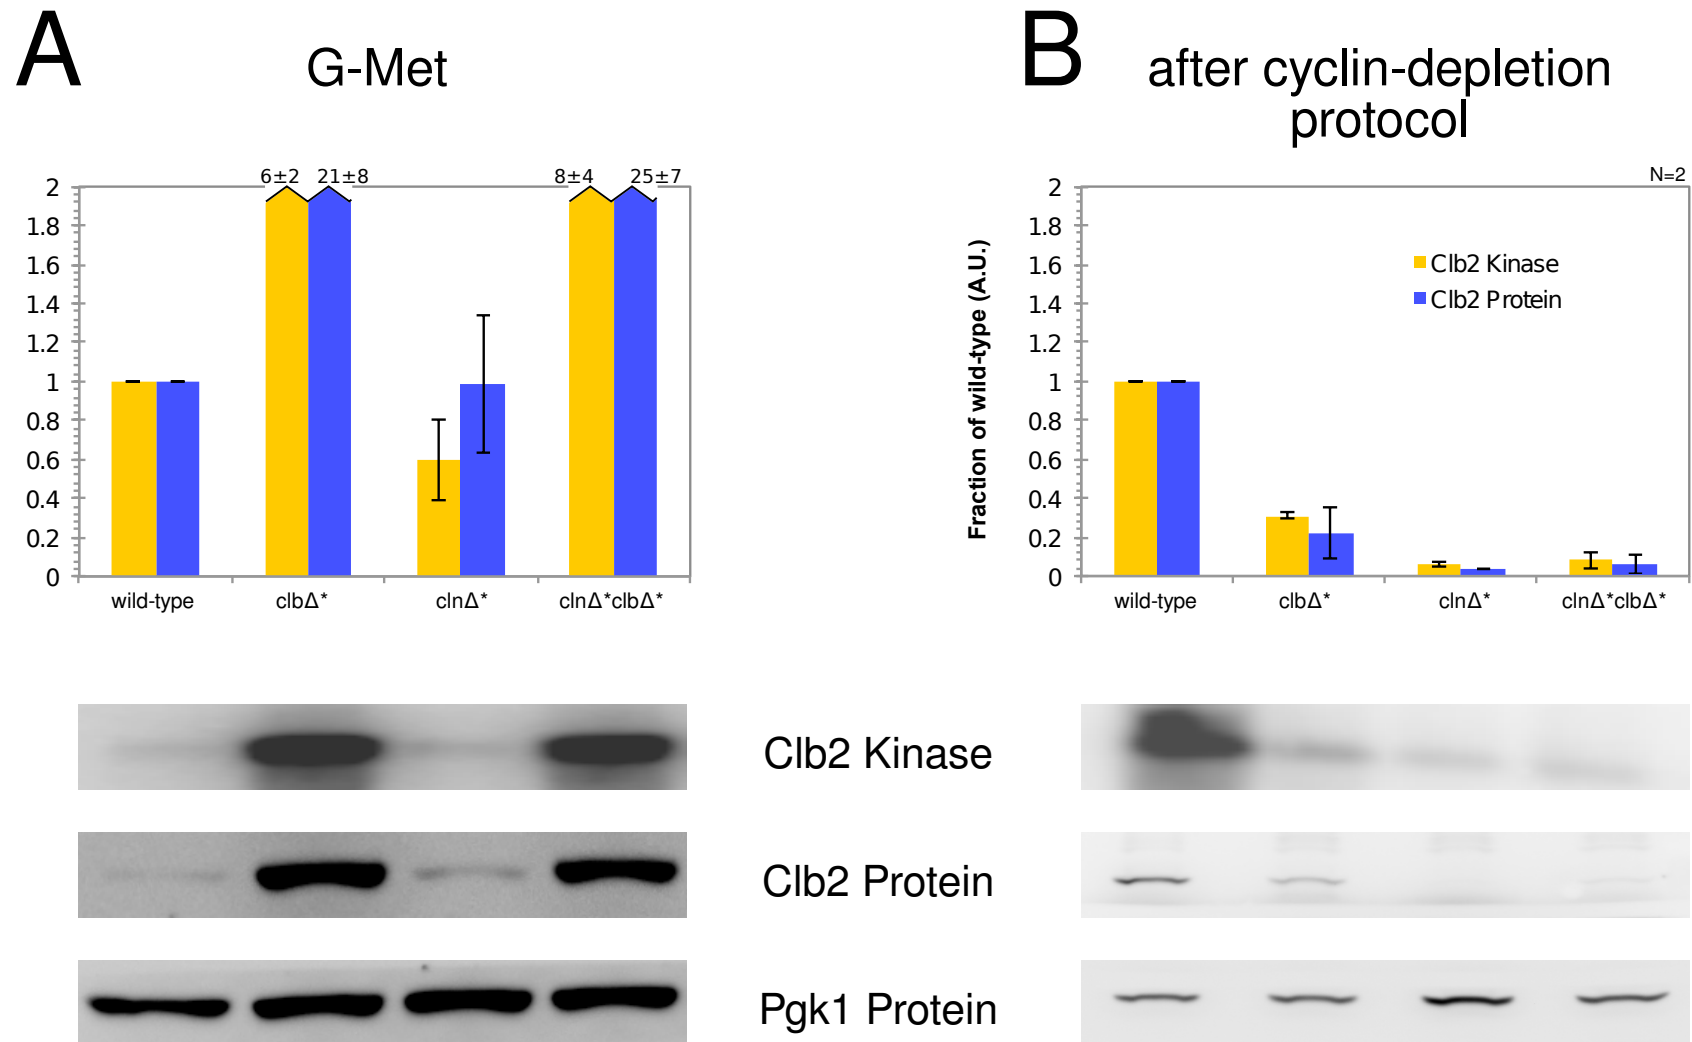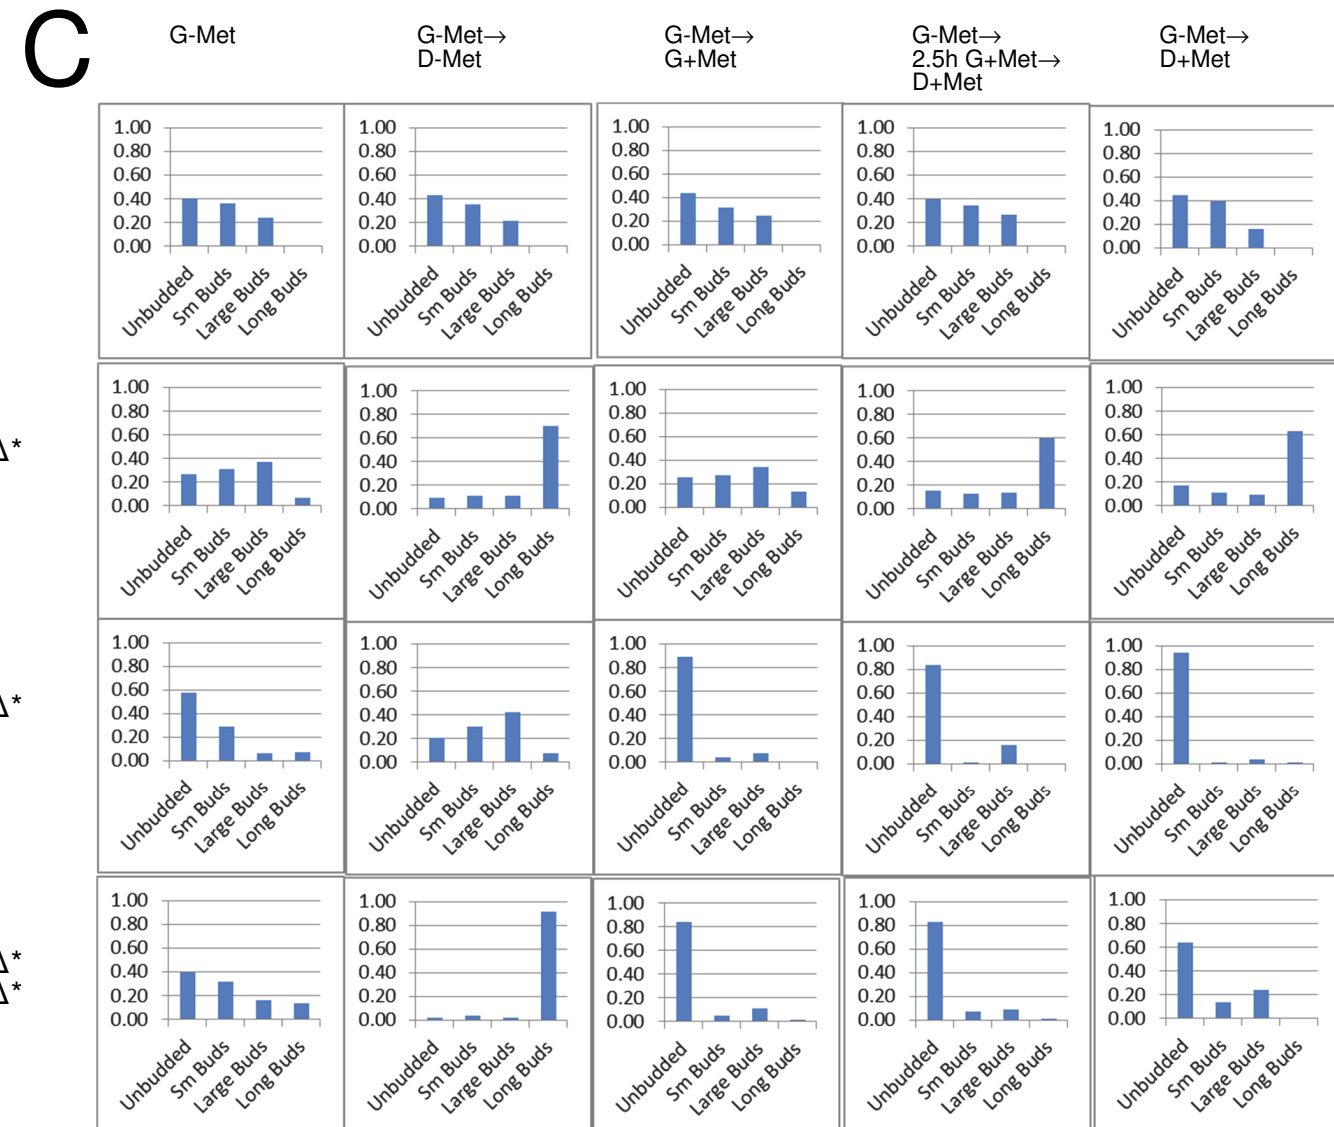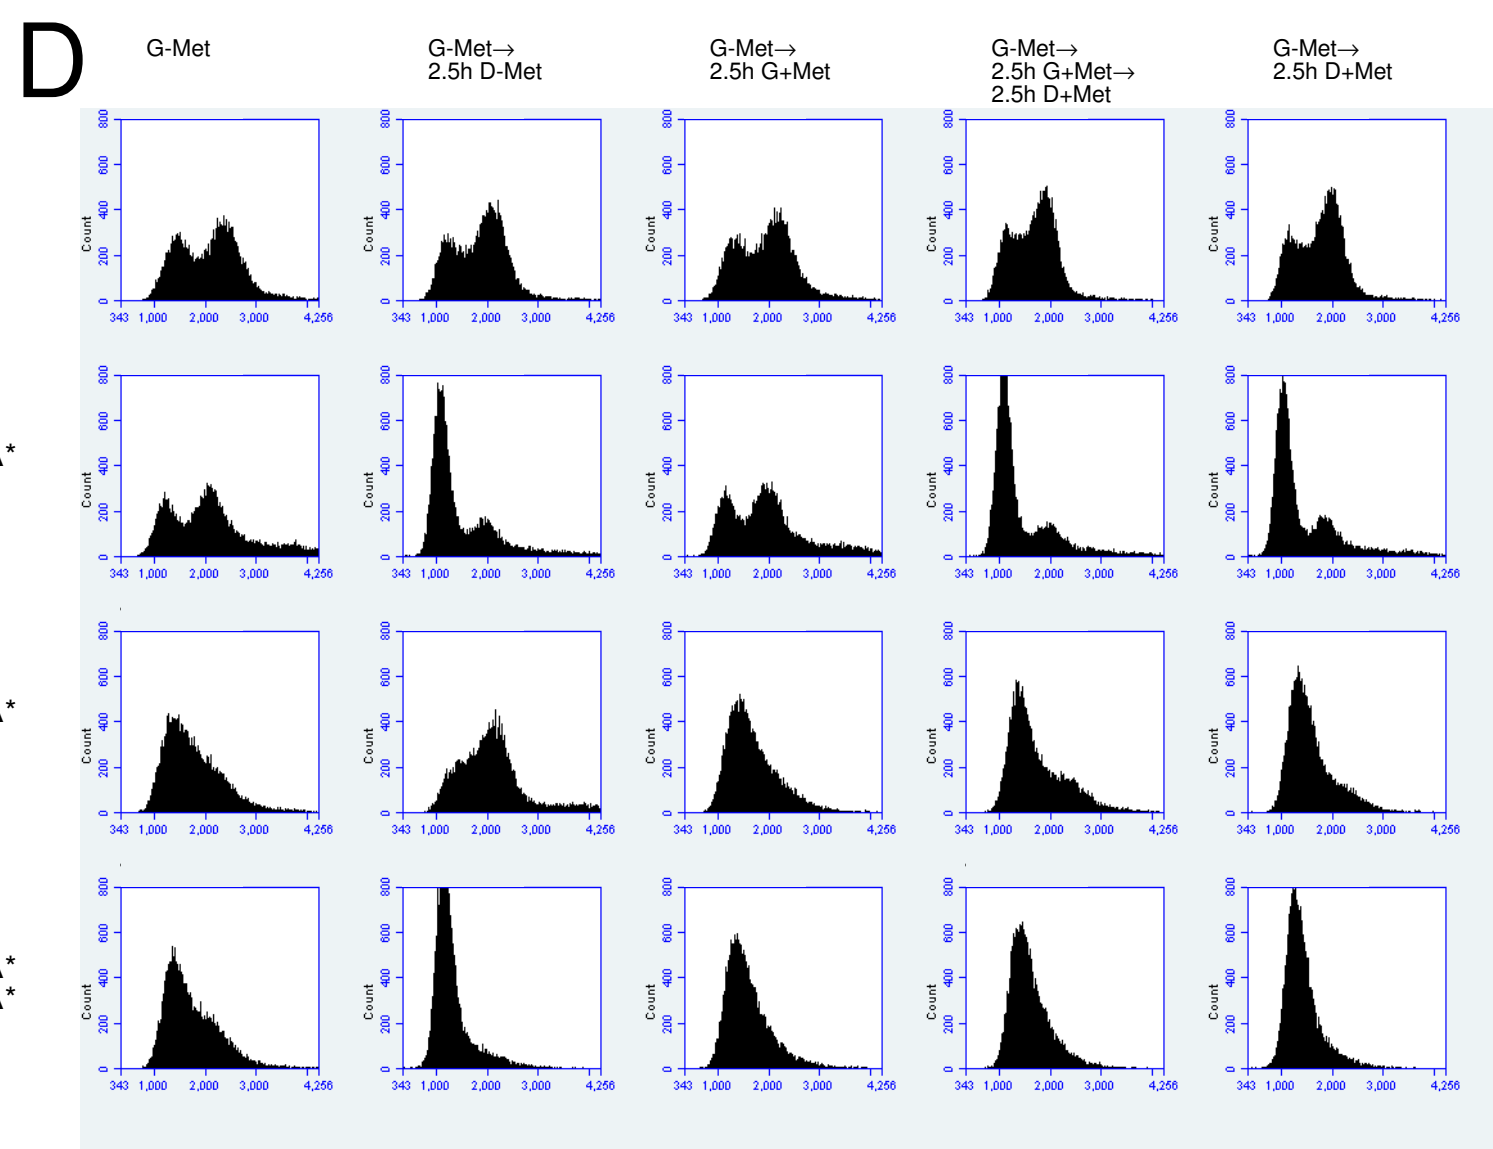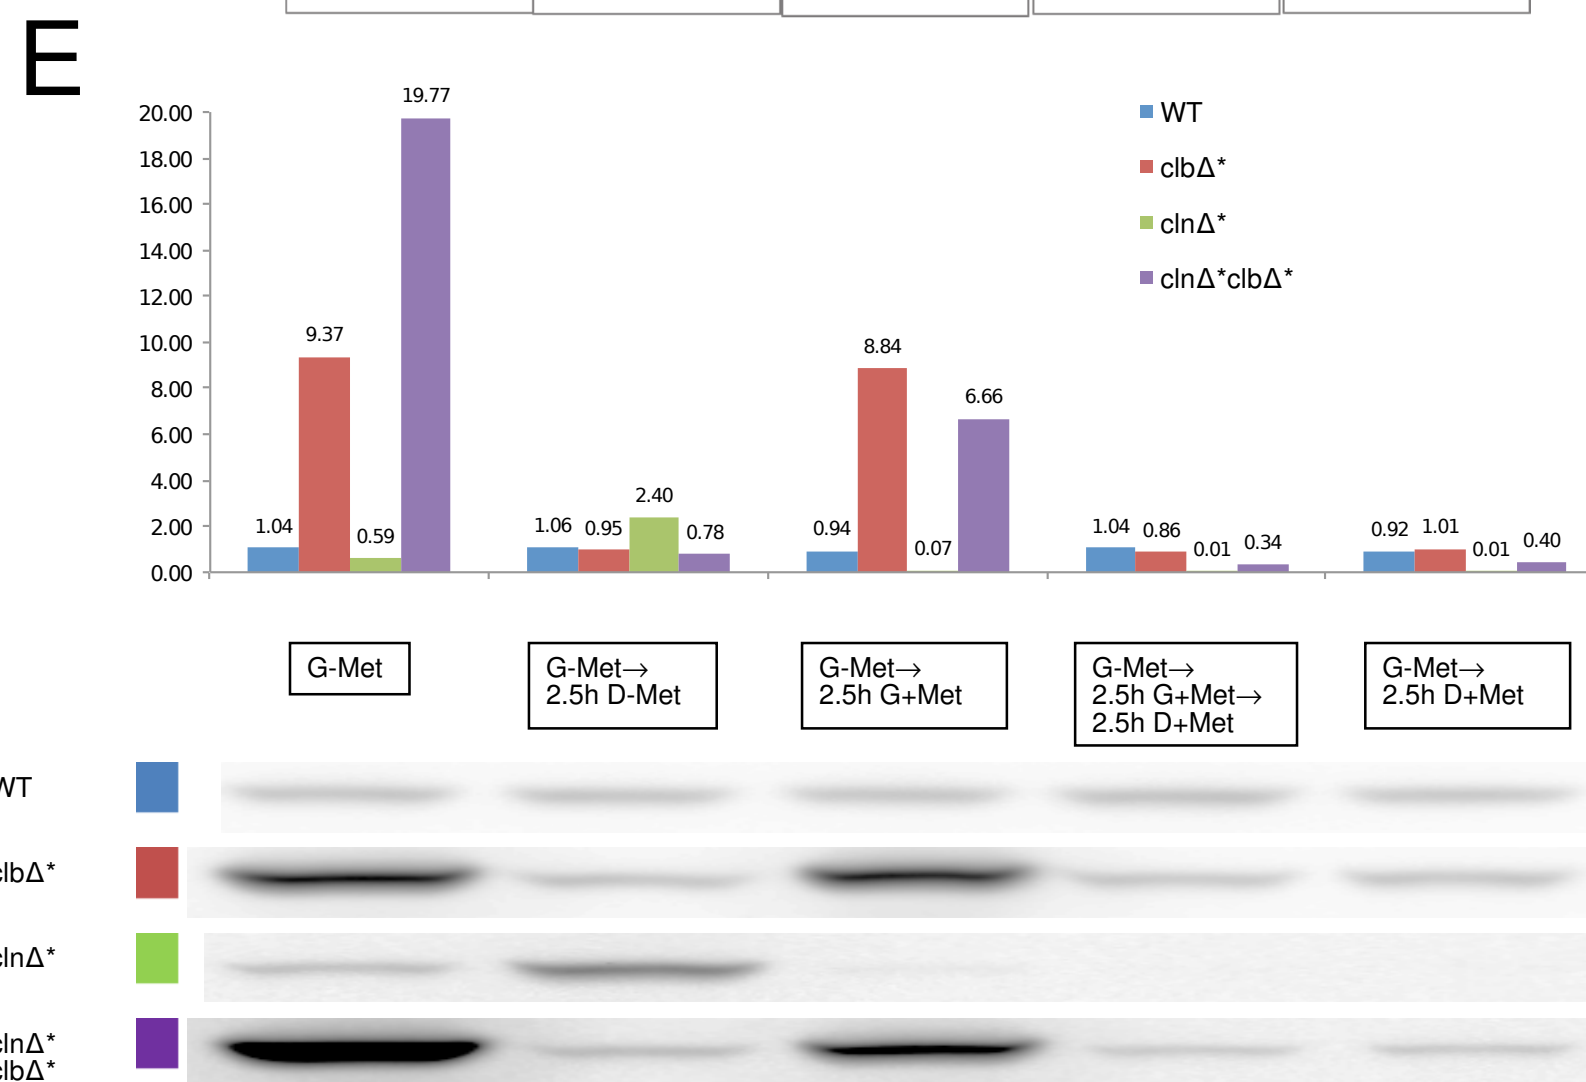

### F

|            | G-Met                              | G-Met→ 2.5h D-Met                | G-Met→ 2.5h G+Met               | G-Met→ 2.5h G+Met→ 2.5h D+Met                                          | G-Met→ 2.5h D+Met                             |
|------------|------------------------------------|----------------------------------|---------------------------------|------------------------------------------------------------------------|-----------------------------------------------|
| WT         | cycling                            | cycling→cycling                  | cycling→cycling                 | cycling→cycling→cycling                                                | cycling→cycling                               |
| clbΔ*      | GALL-CLB2 on = cycling             | cycling → GALL-CLB2 off for 2.5h | cycling → cycling               | cycling → cycling → GALL-CLB2 off for 2.5 h                            | cycling → GALL-CLB2 off for 2.5h              |
| clnΔ*      | MET-CLN2 on = cycling              | cycling → cycling                | cycling → MET-CLN2 off for 2.5h | cycling → MET-CLN2 off for 2.5h → MET-CLN2 off for 2.5 h               | cycling → MET-CLN2 off for 2.5h               |
| clnΔ*clbΔ* | MET-CLN2 on GALL-CLB2 on = cycling | cycling → GALL-CLB2 off for 2.5h | cycling → MET-CLN2 off for 2.5h | cycling → MET-CLN2 off for 2.5h → MET-CLN2 off GALL-CLB2 off for 2.5 h | cycling → MET-CLN2 off GALL-CLB2 off for 2.5h |

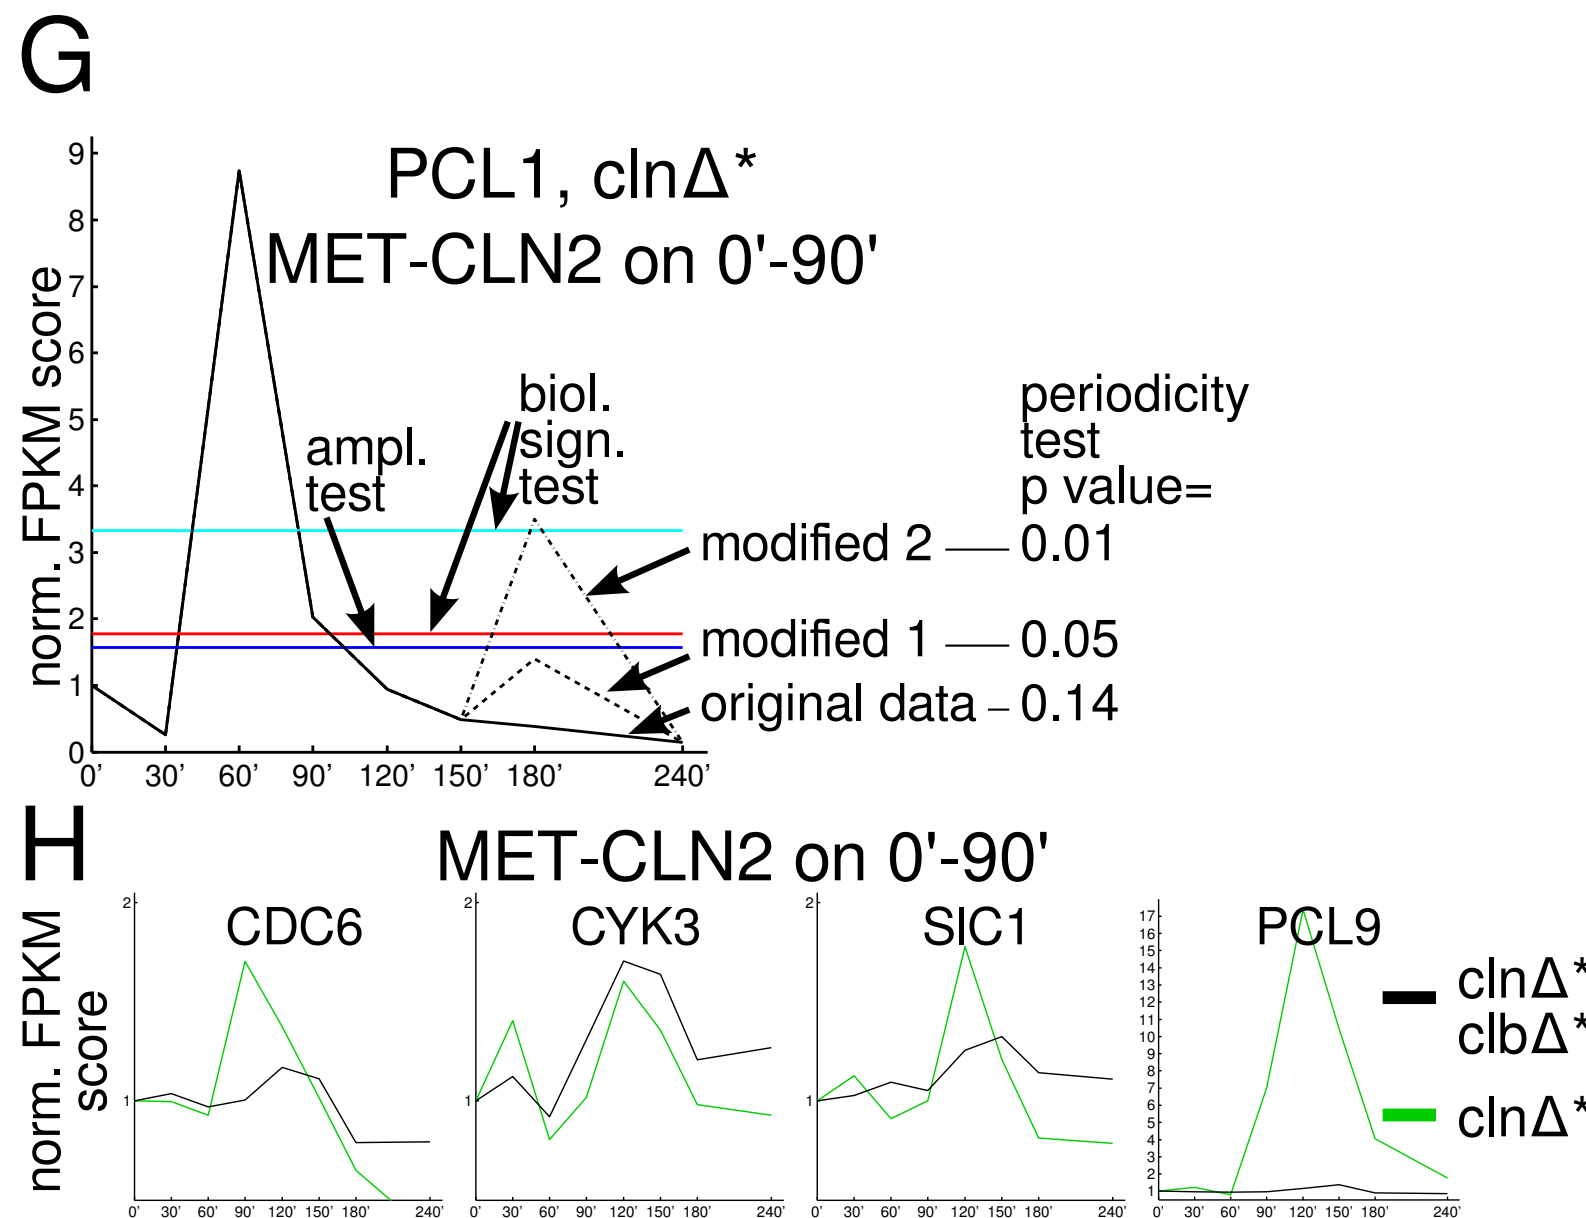

Supplement: NIHMS765458-supplement-2.pdf [file NIHMS765458-supplement-2.pdf]
