# Supplementary material
Source: PubMed Central journal article supplement (PMC4826480)

**A** Single-cell time course: Scatter plot:

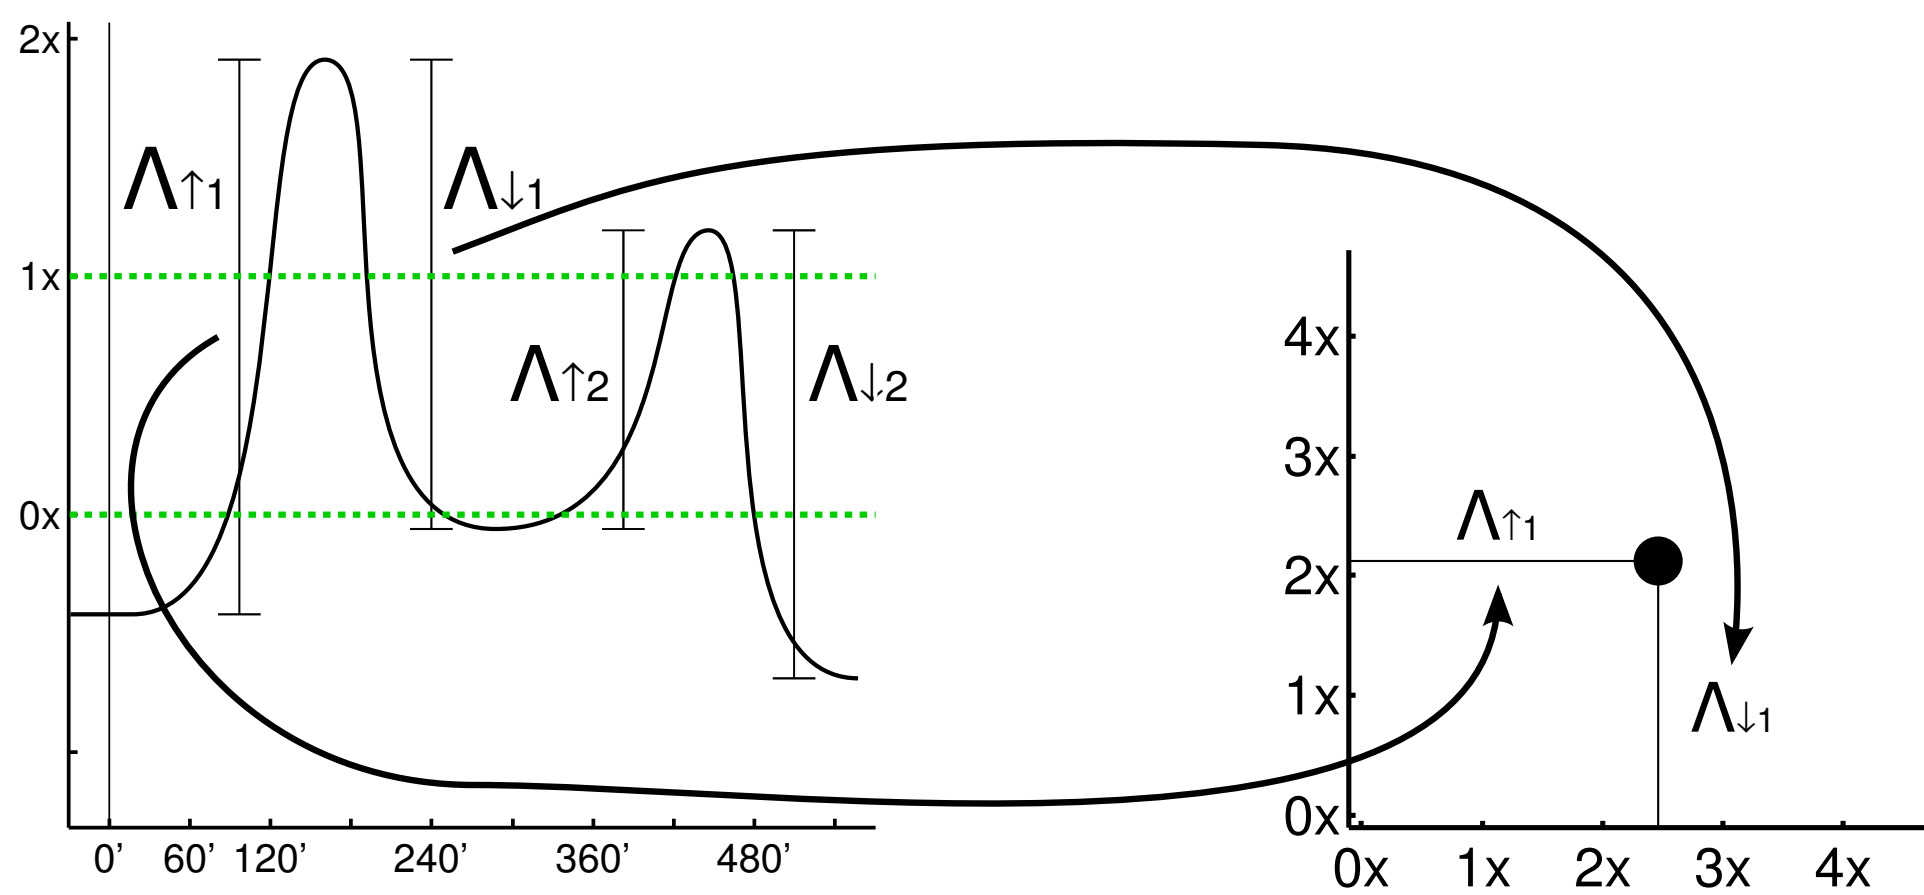

**B** CLN2pr-YFP/GFP

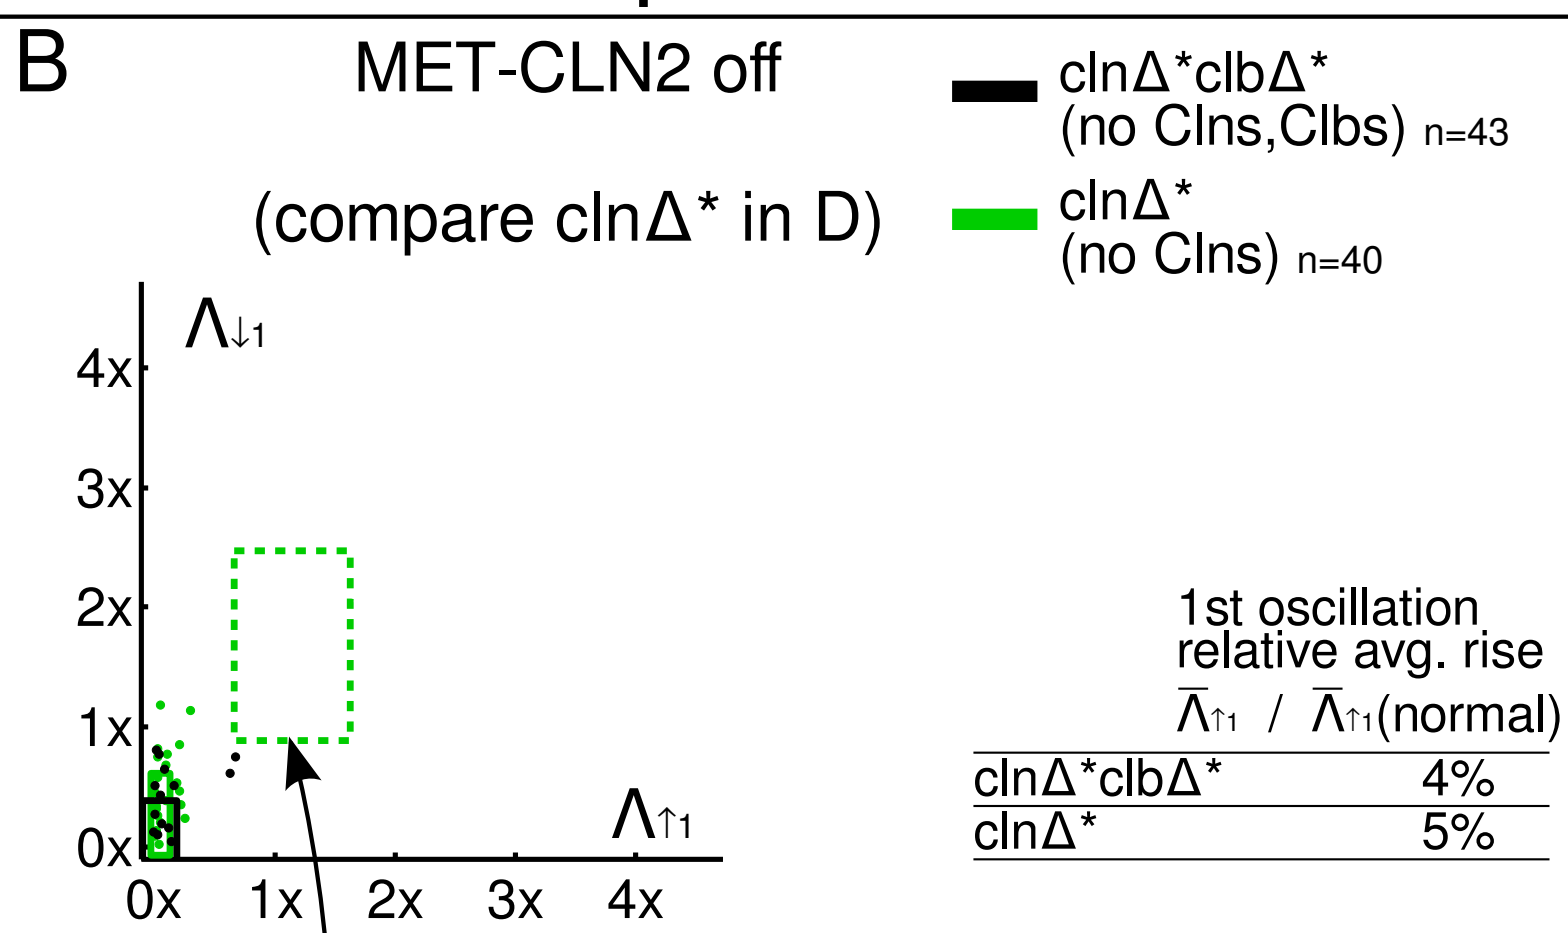

**C** CLB2pr-GFP

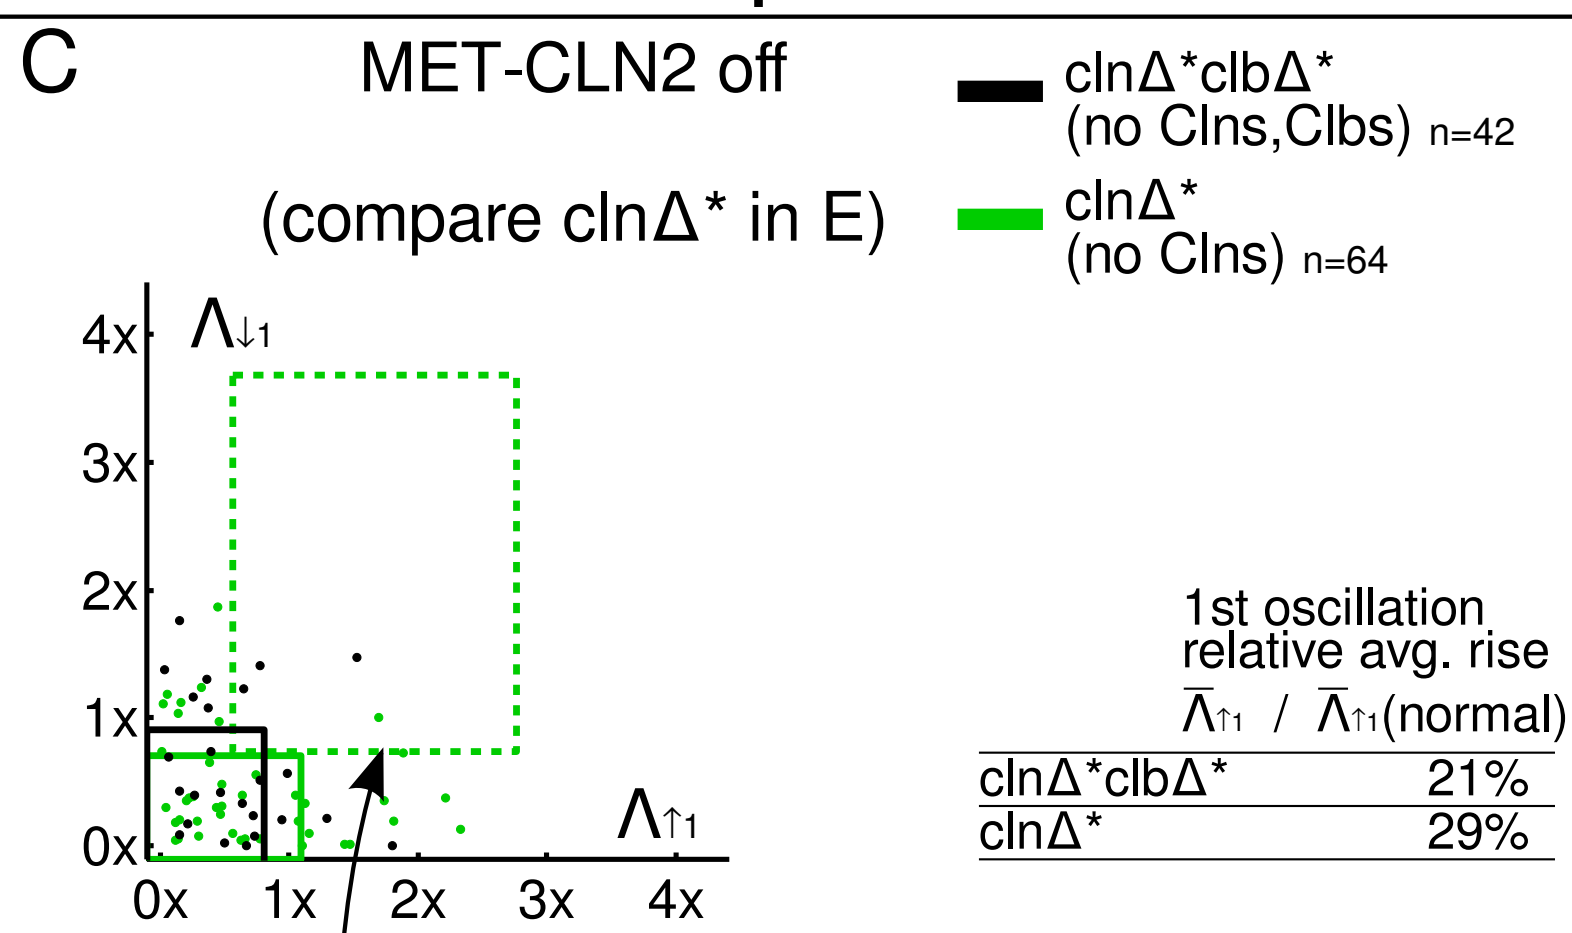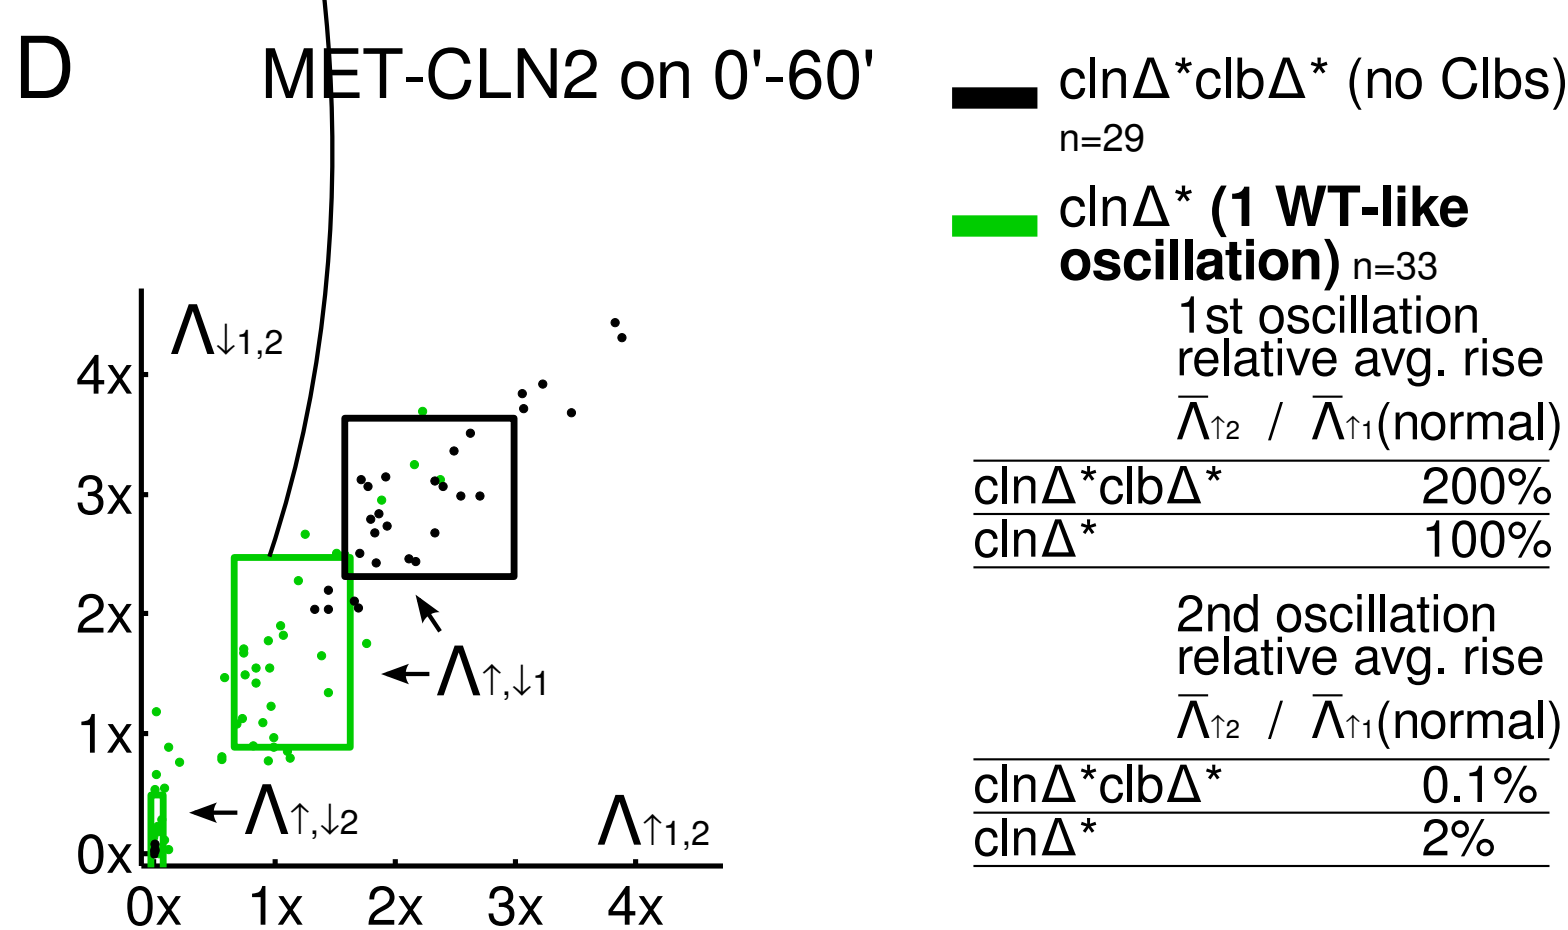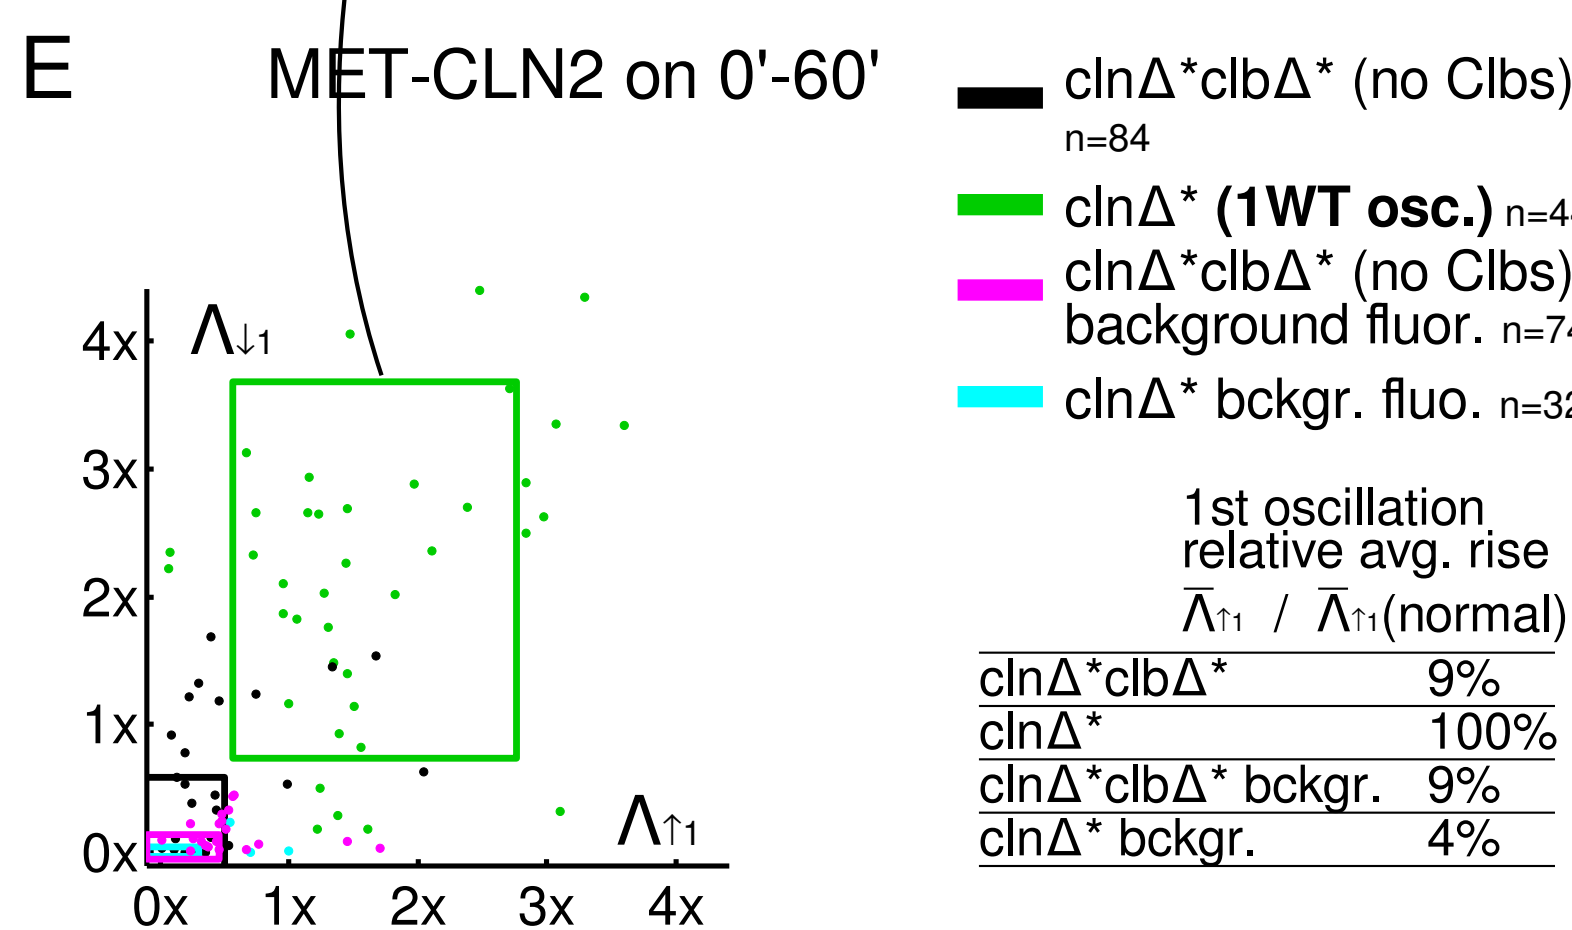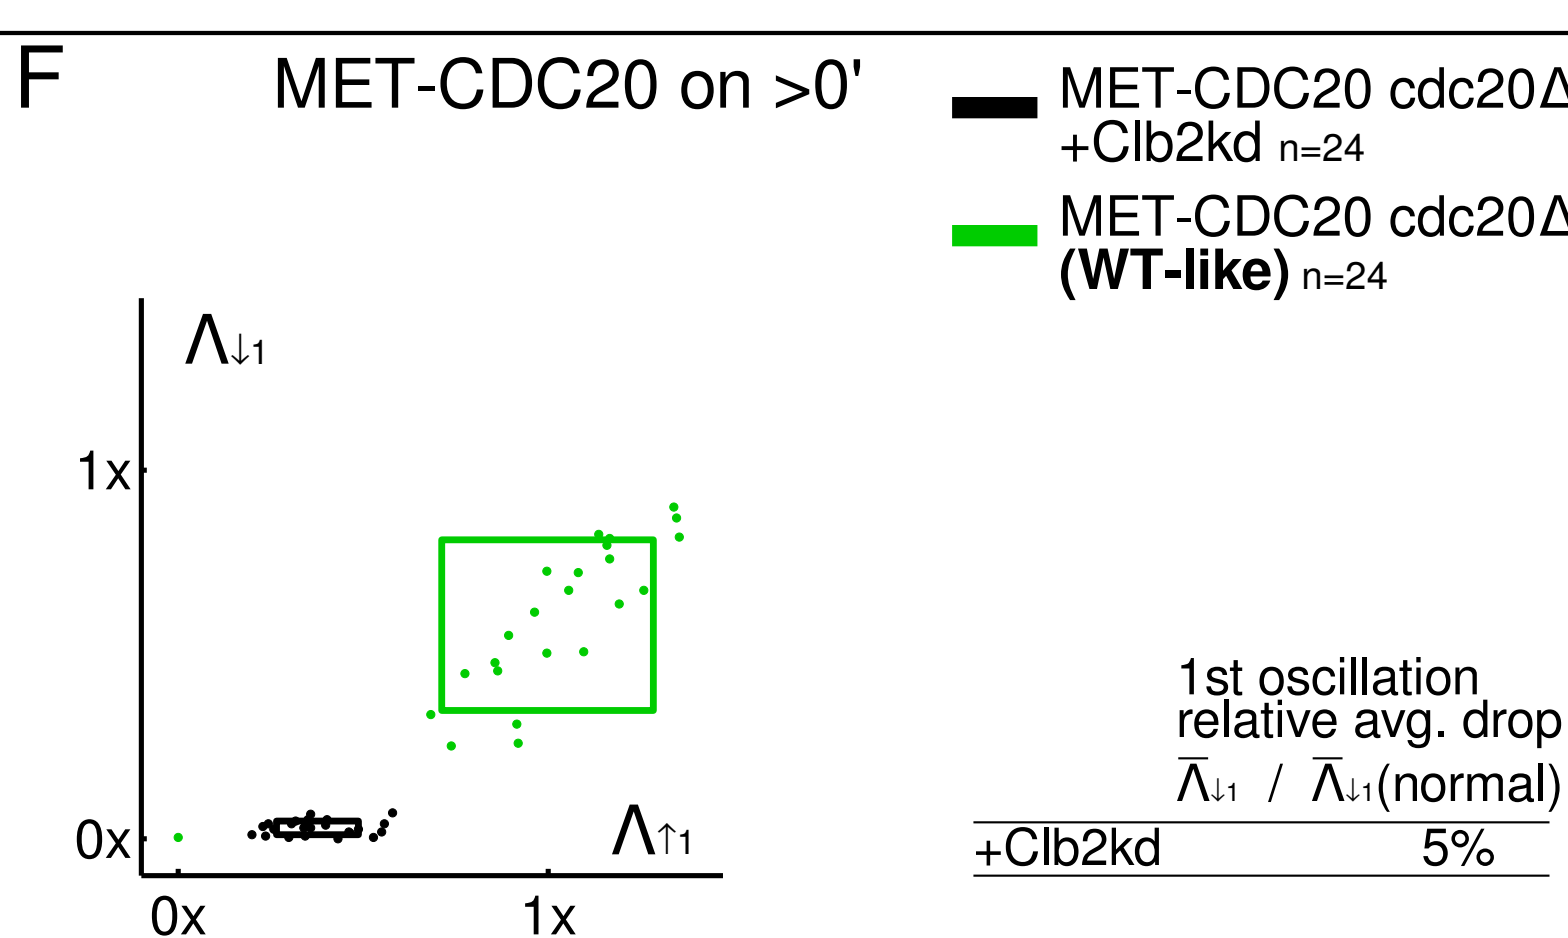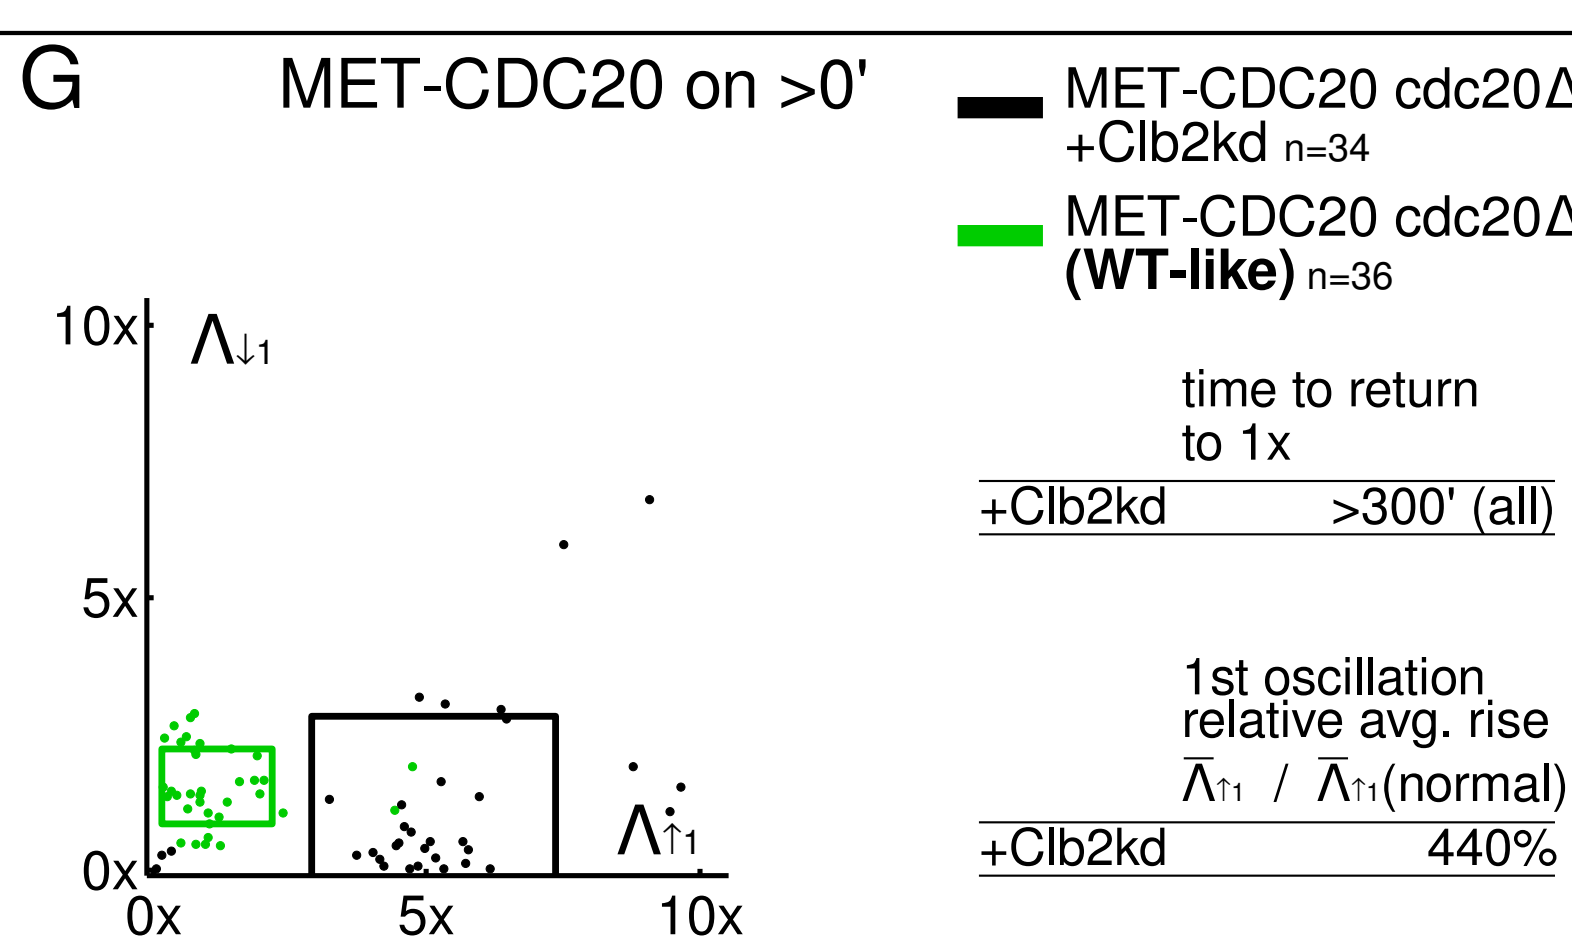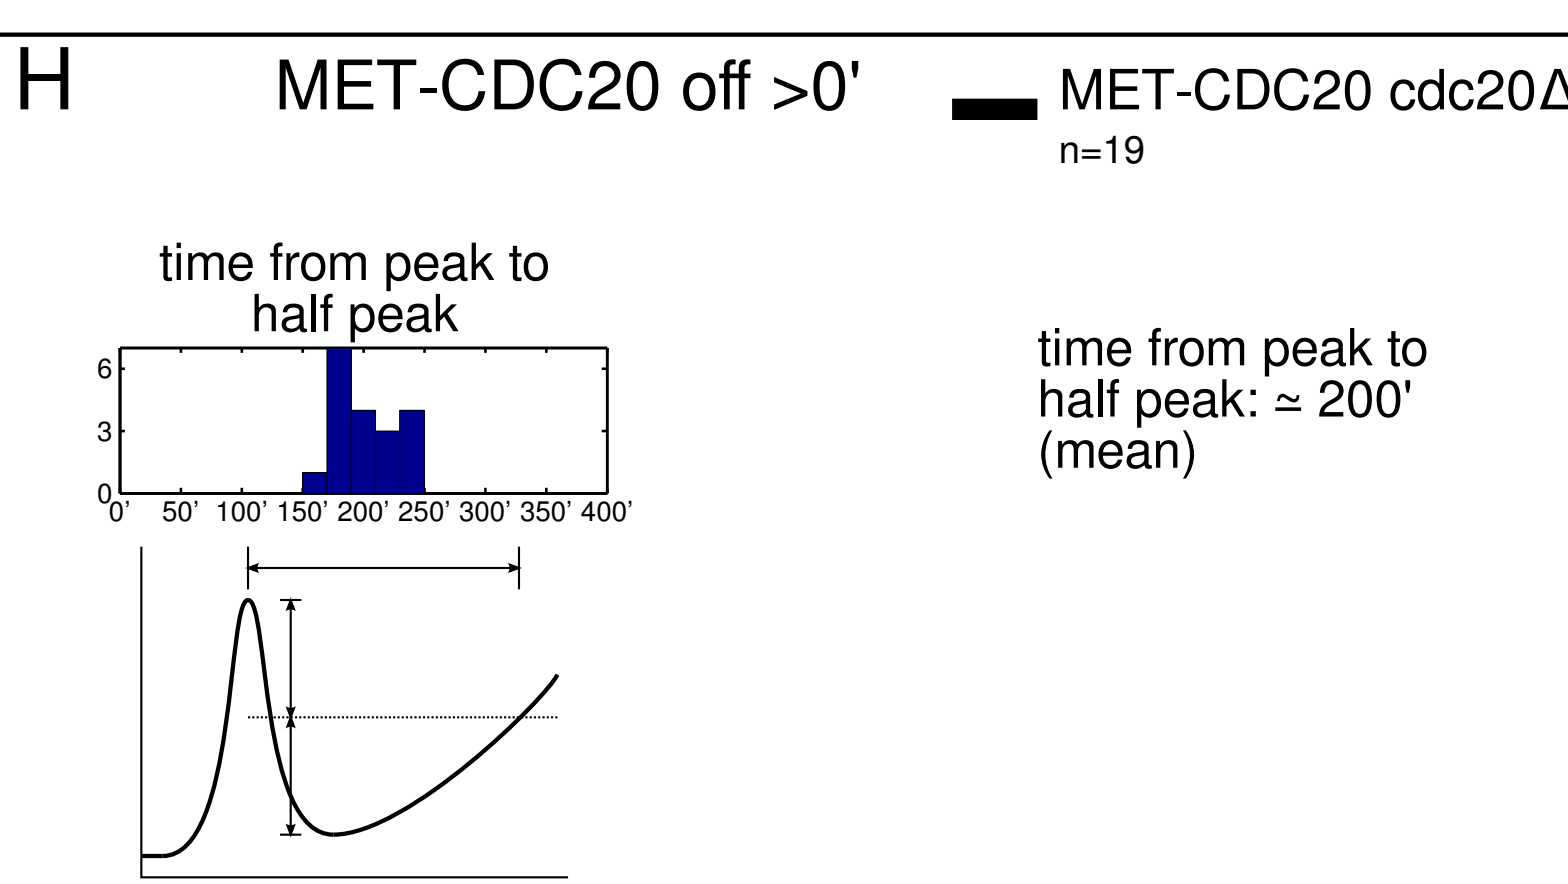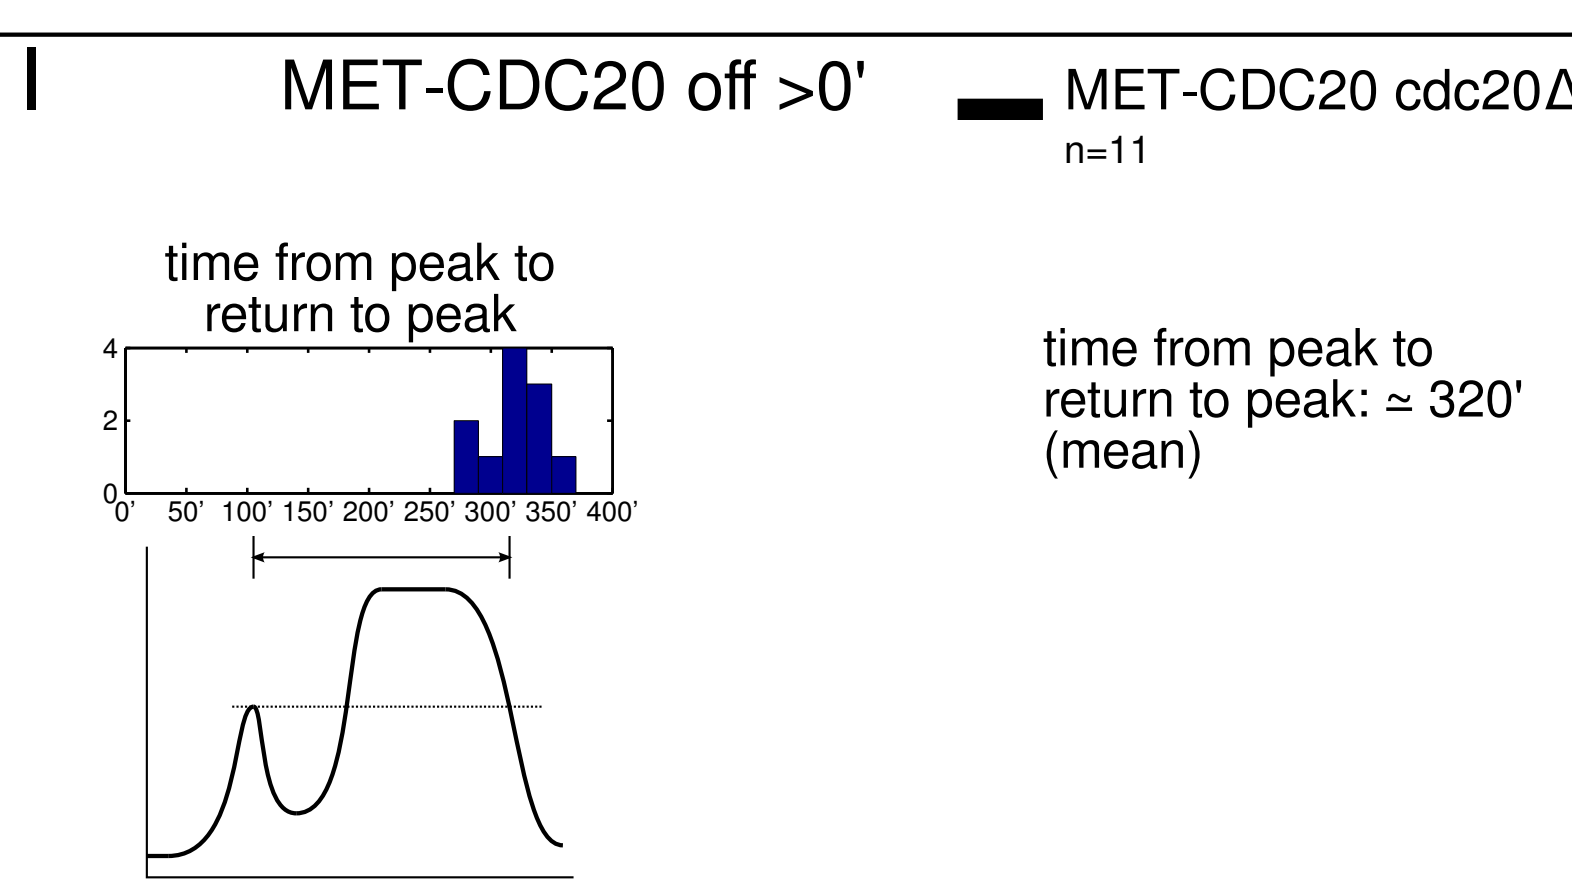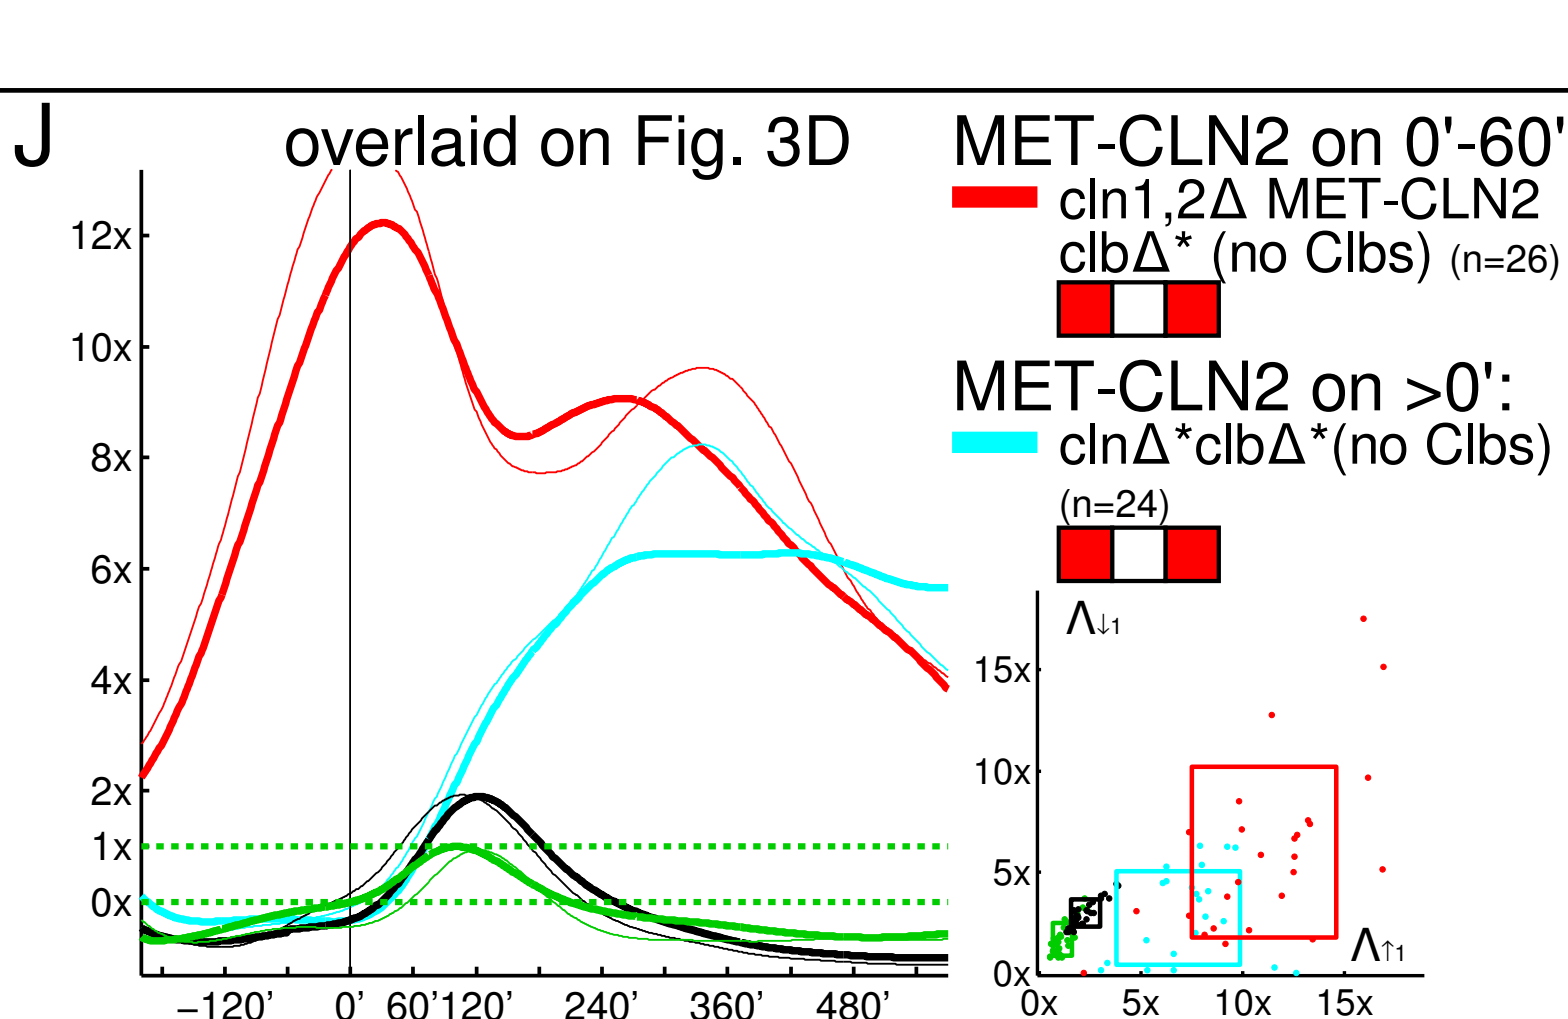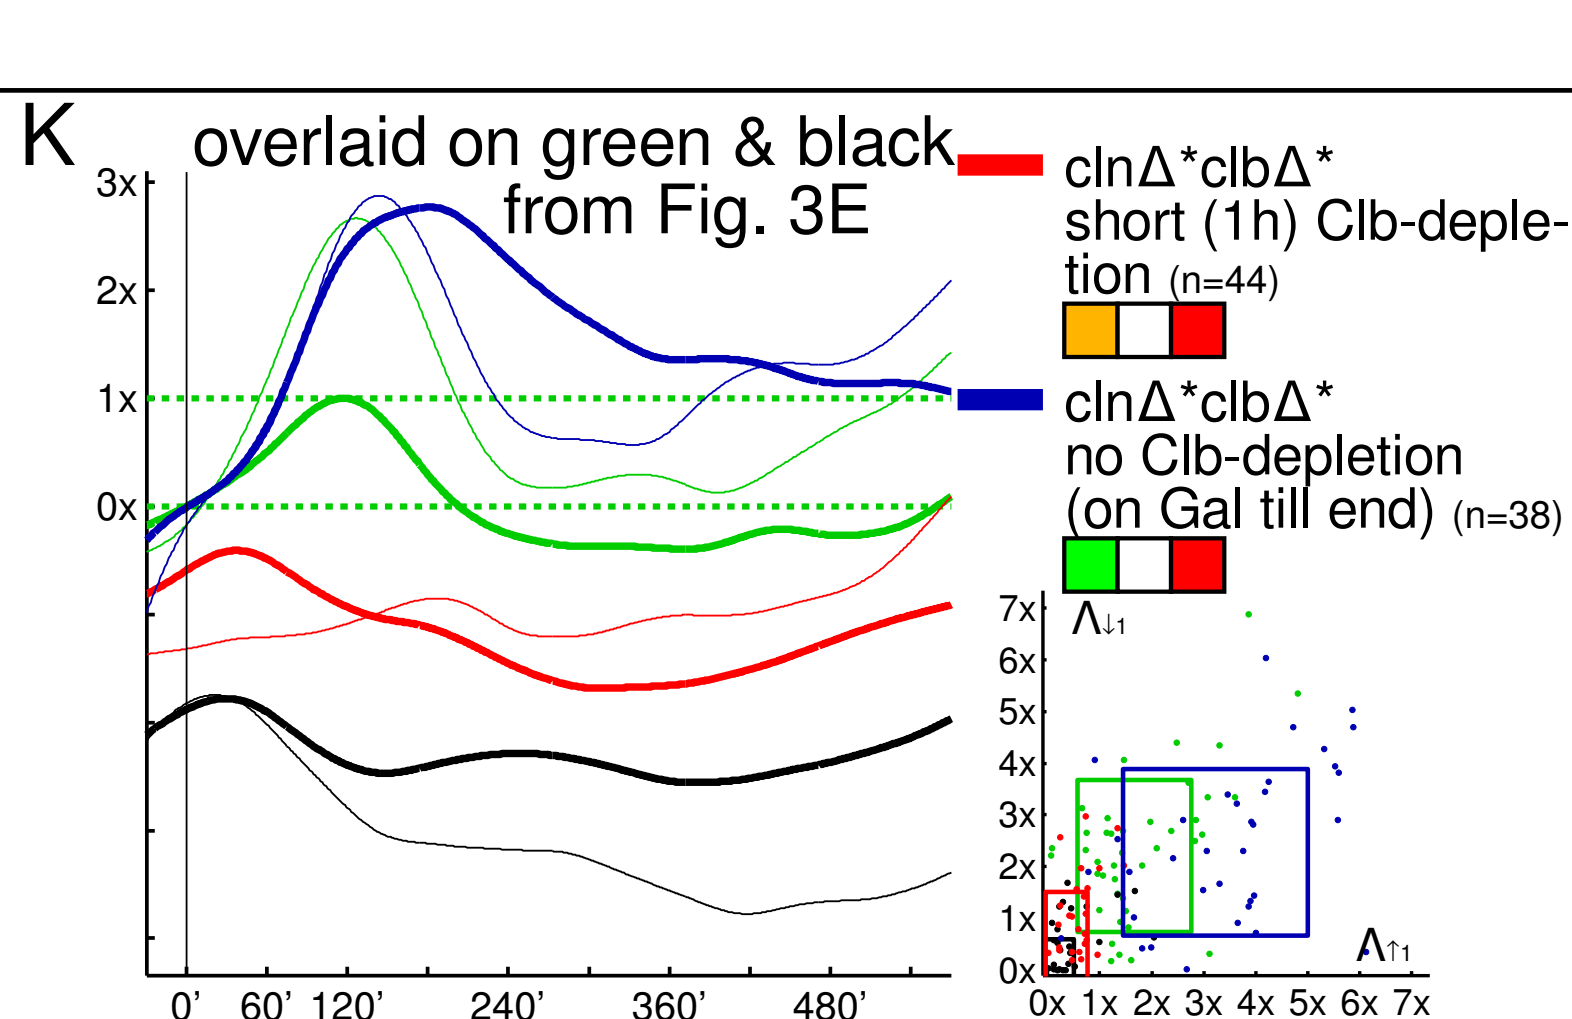

Supplement: NIHMS765458-supplement-3.pdf [file NIHMS765458-supplement-3.pdf]

### SIC1pr-YFP

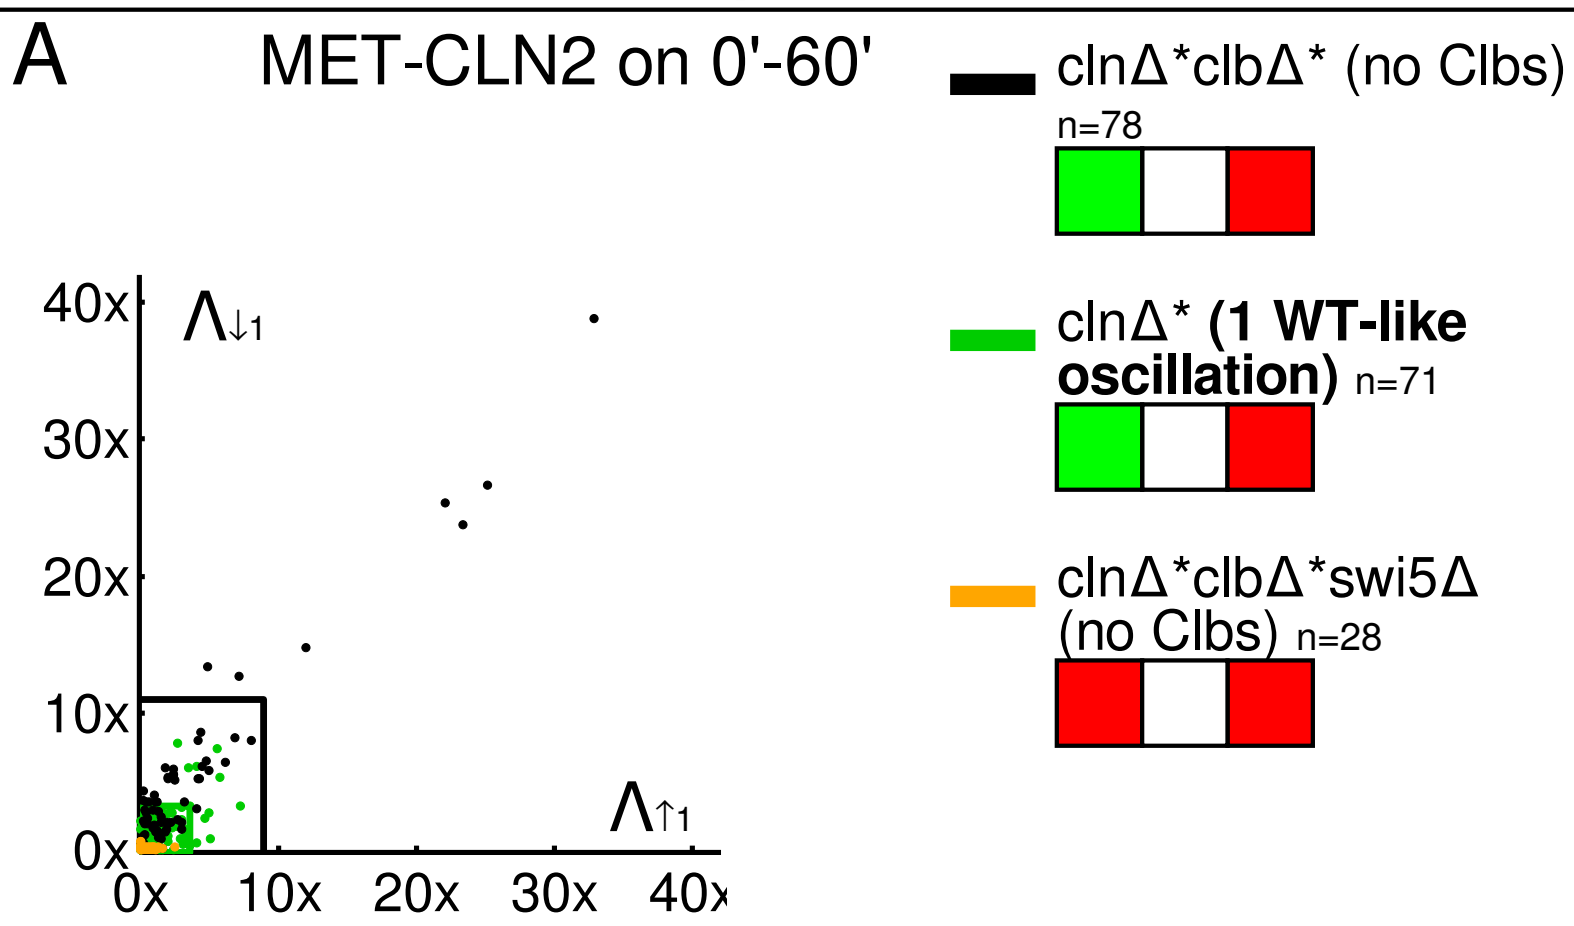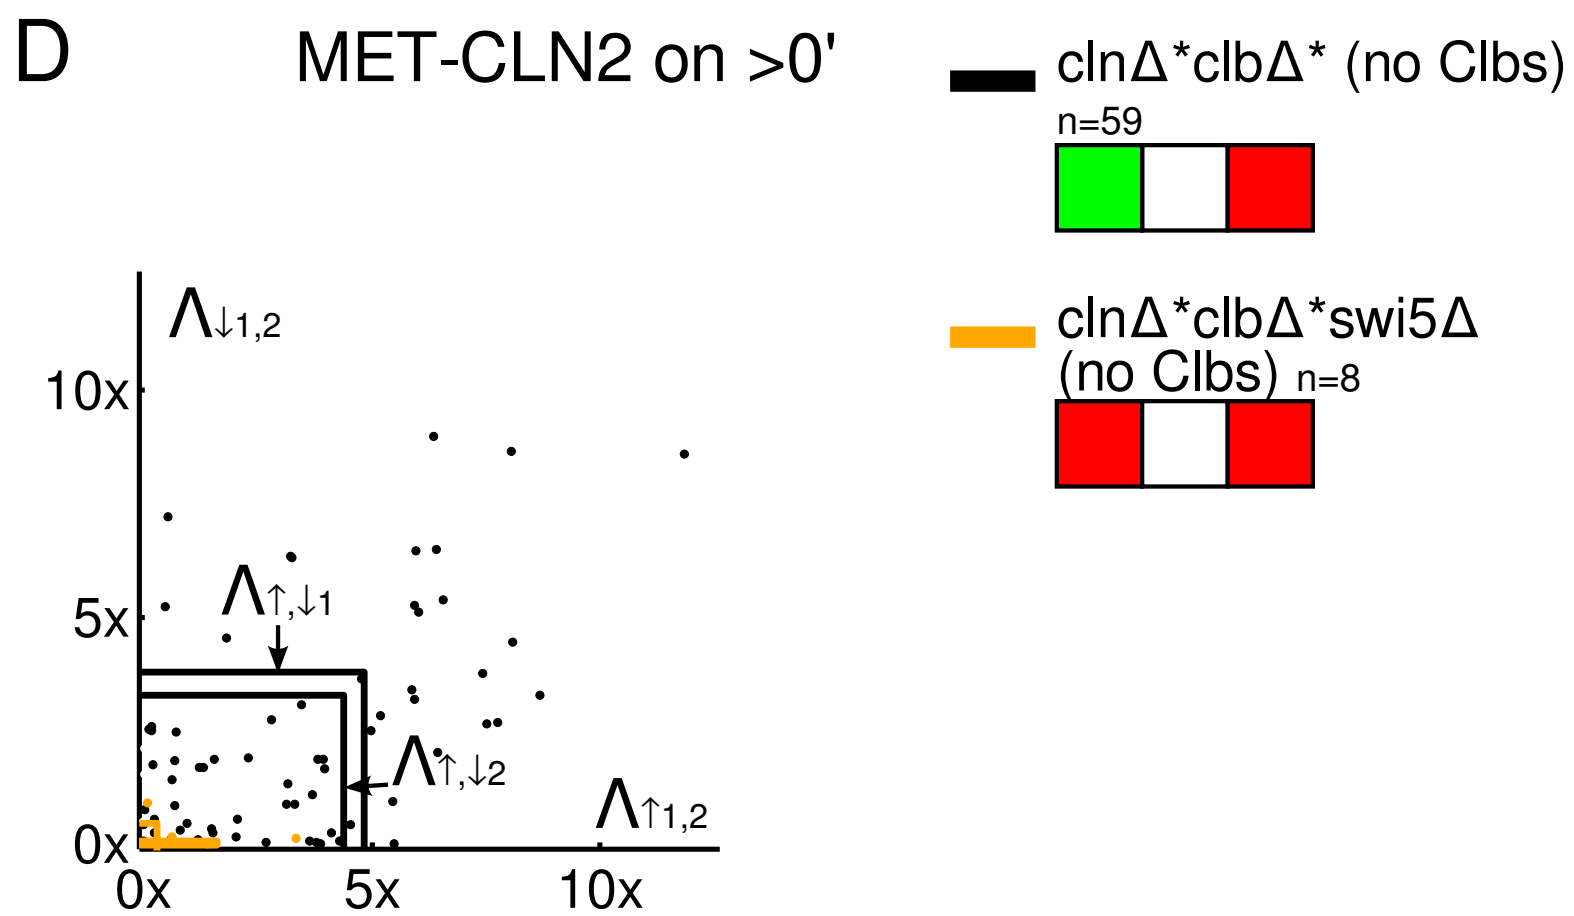

### CYK3pr-YFP

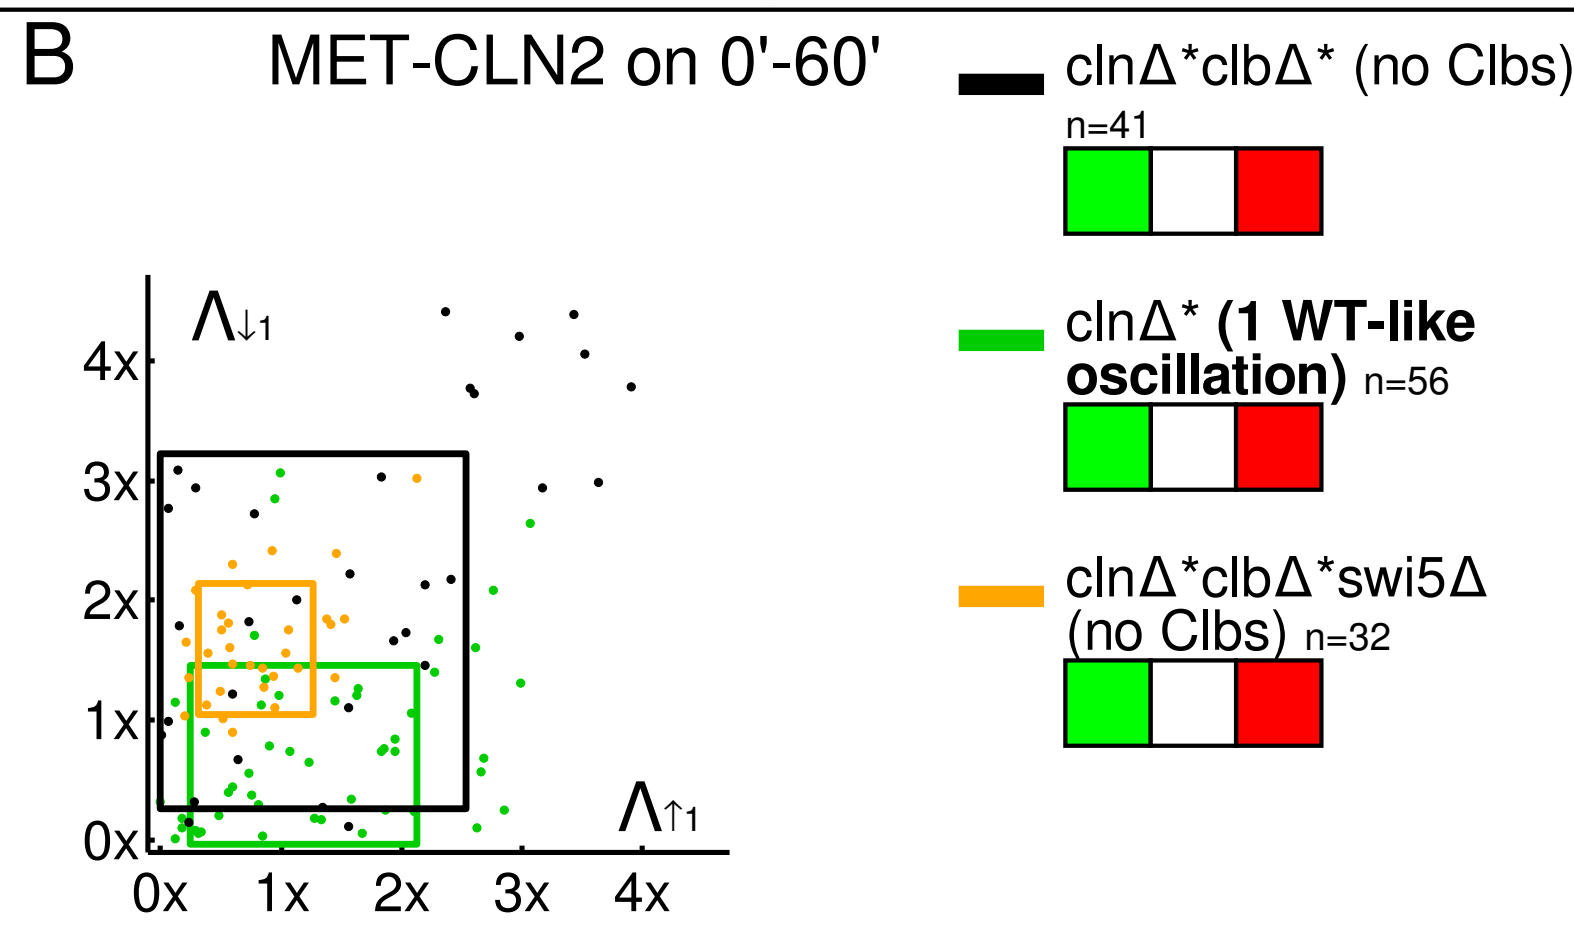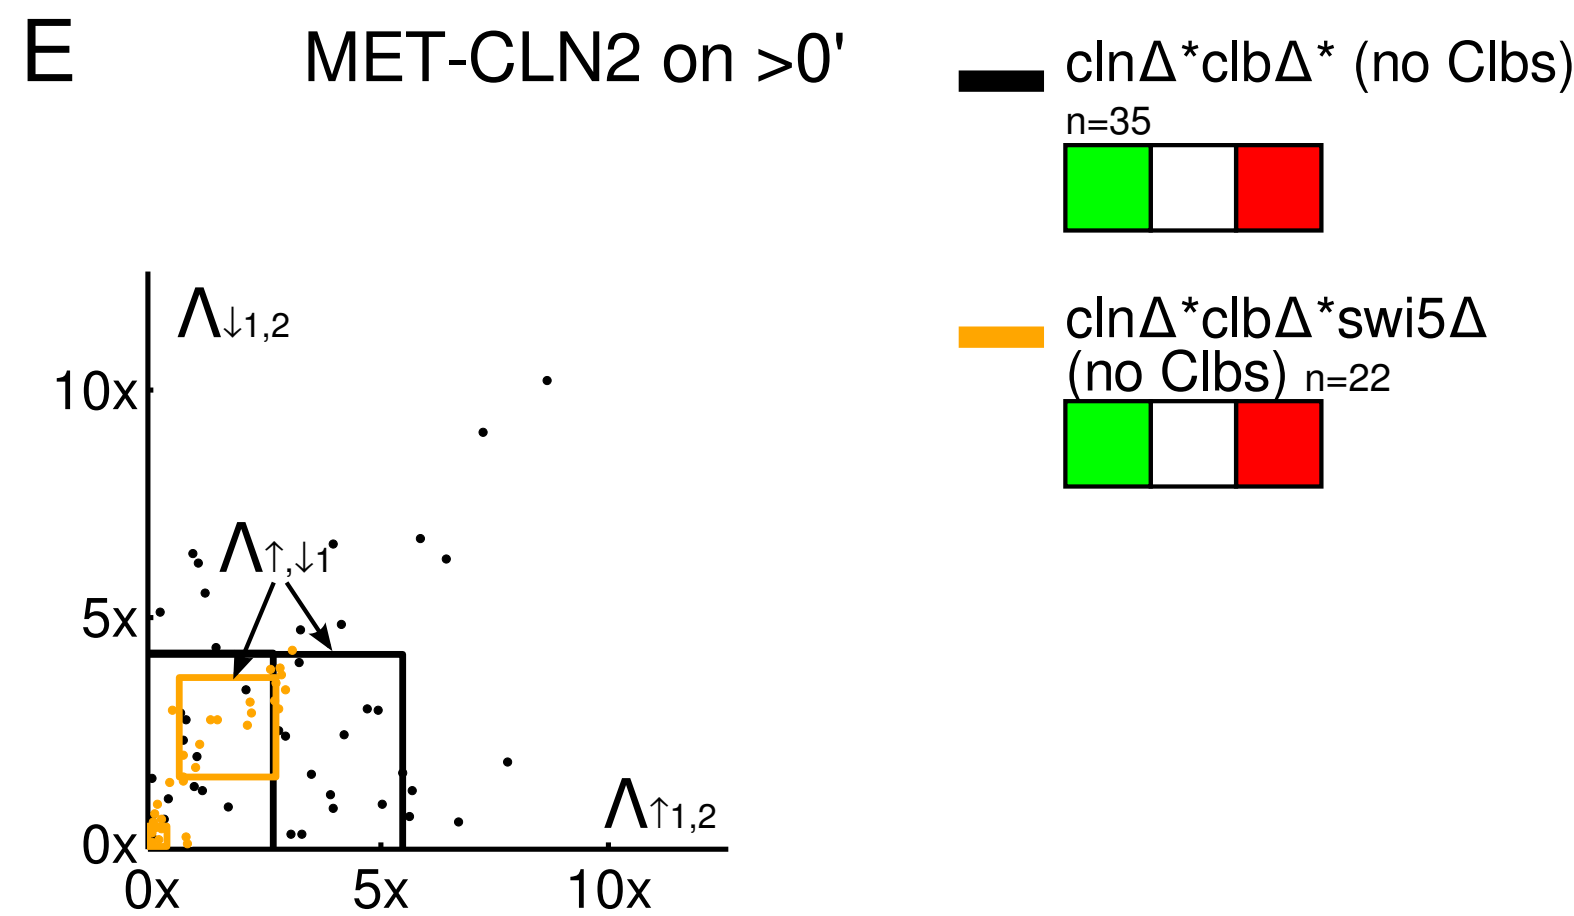

### CDC6pr-YFP

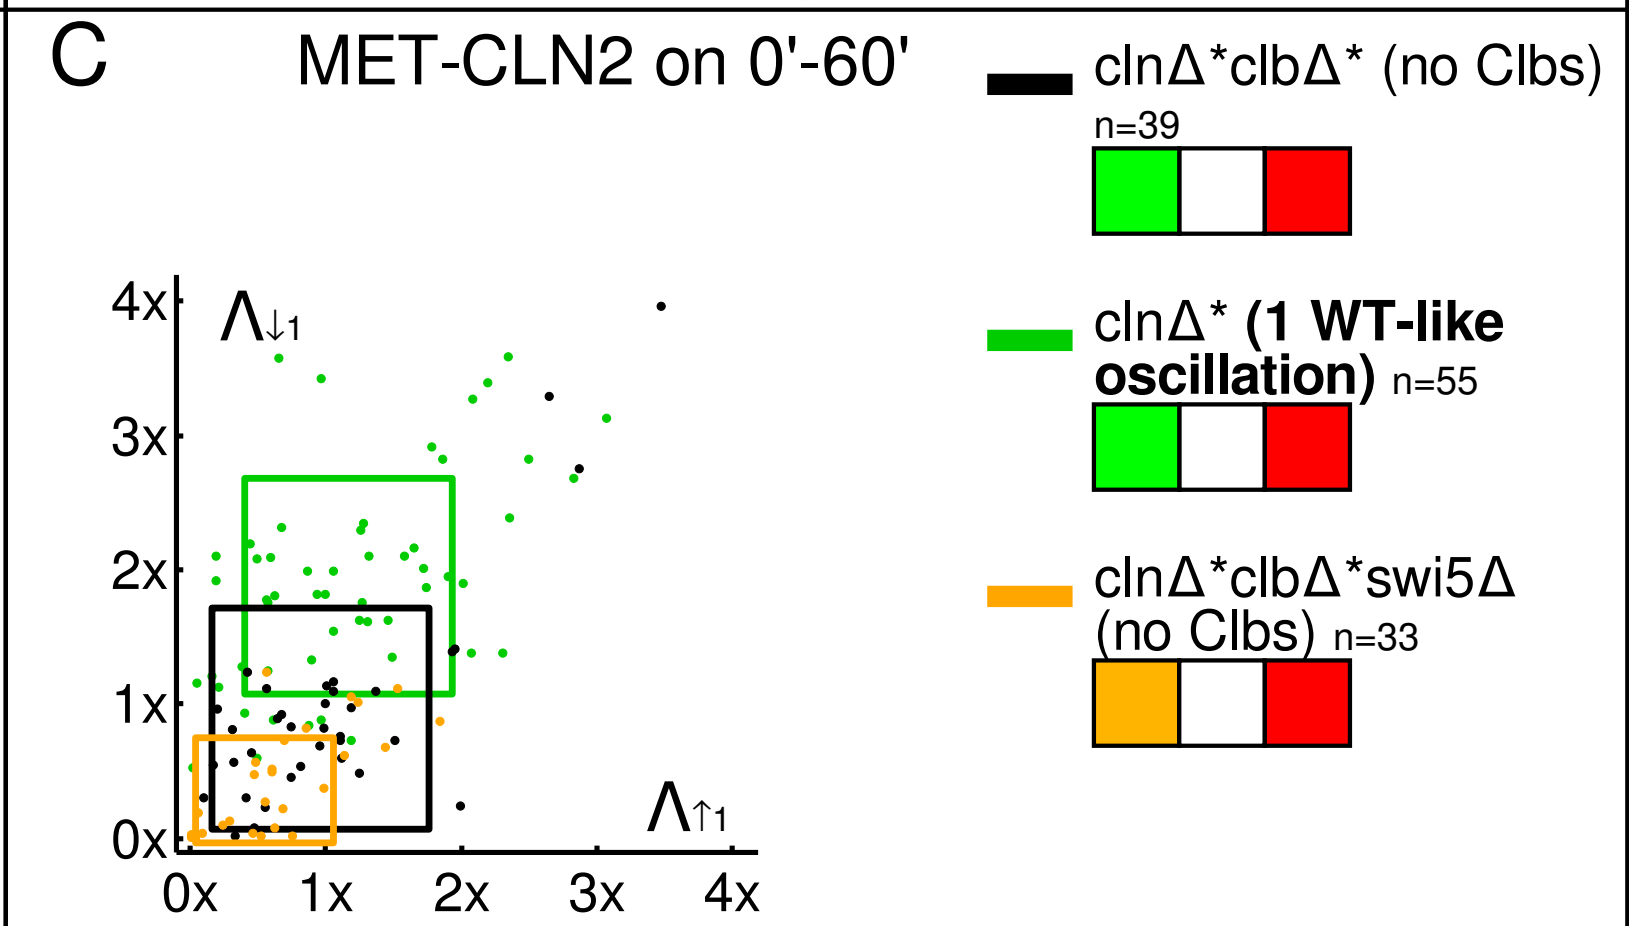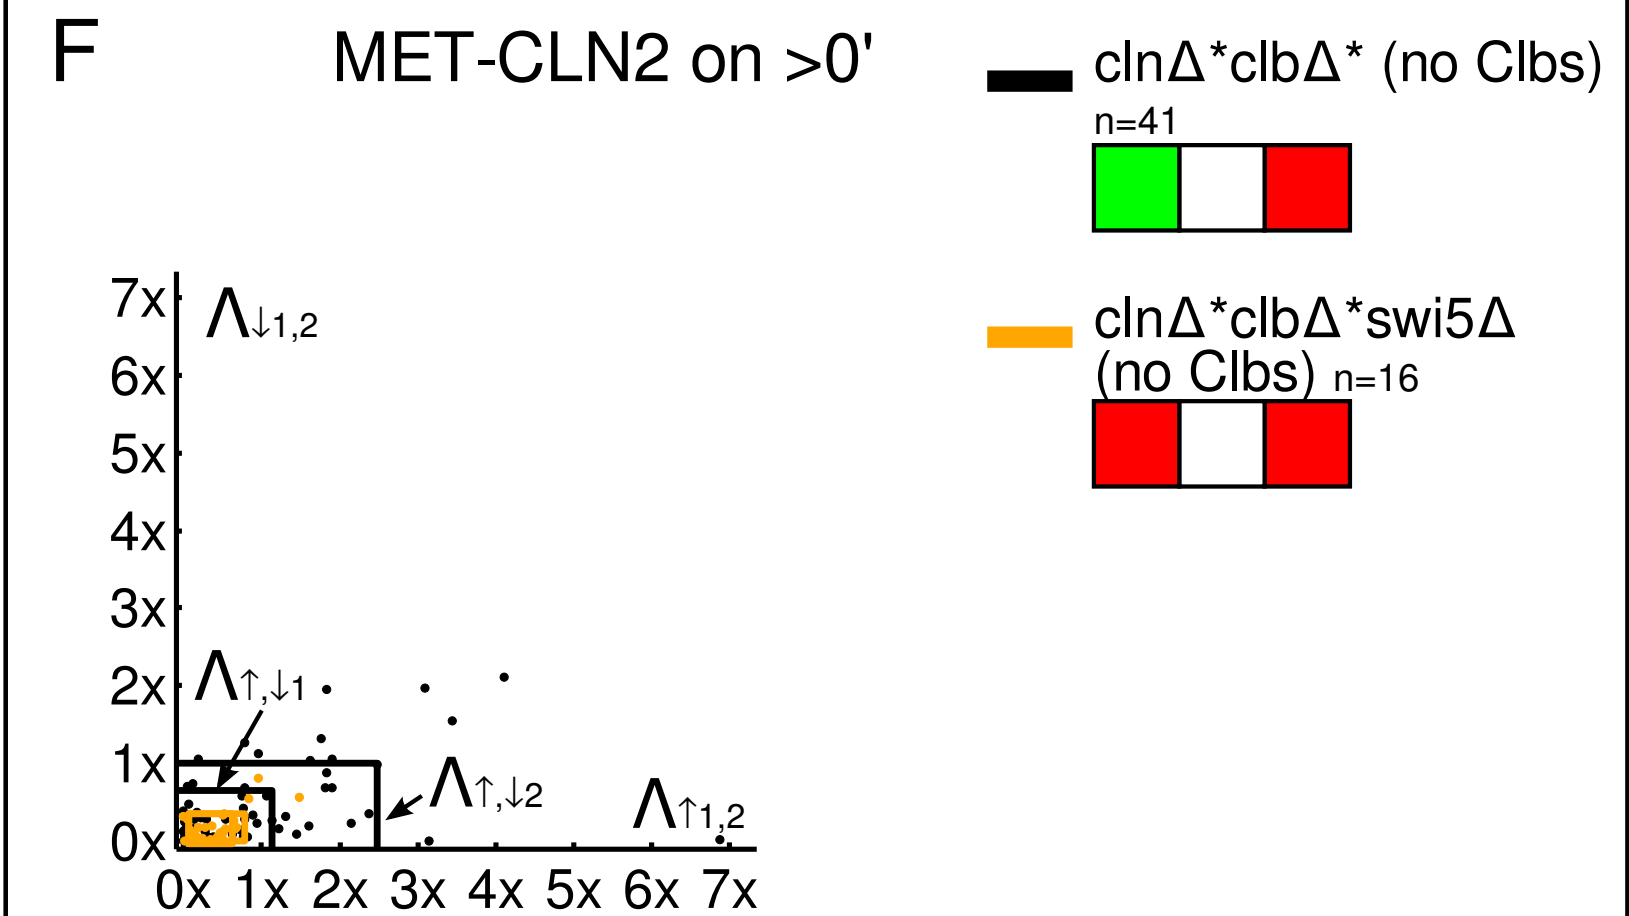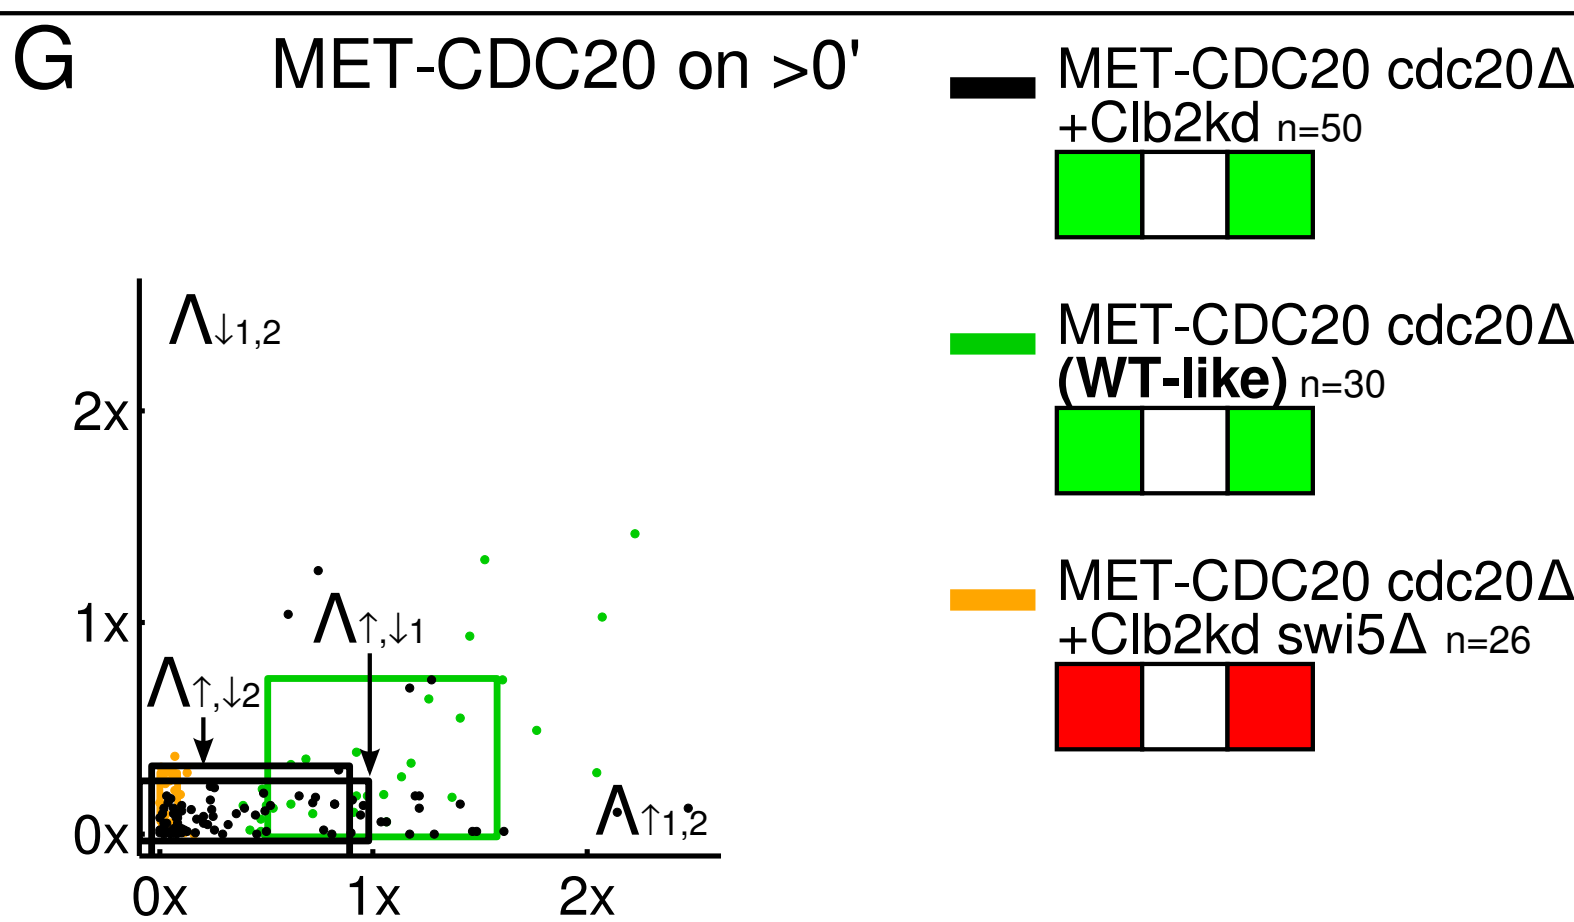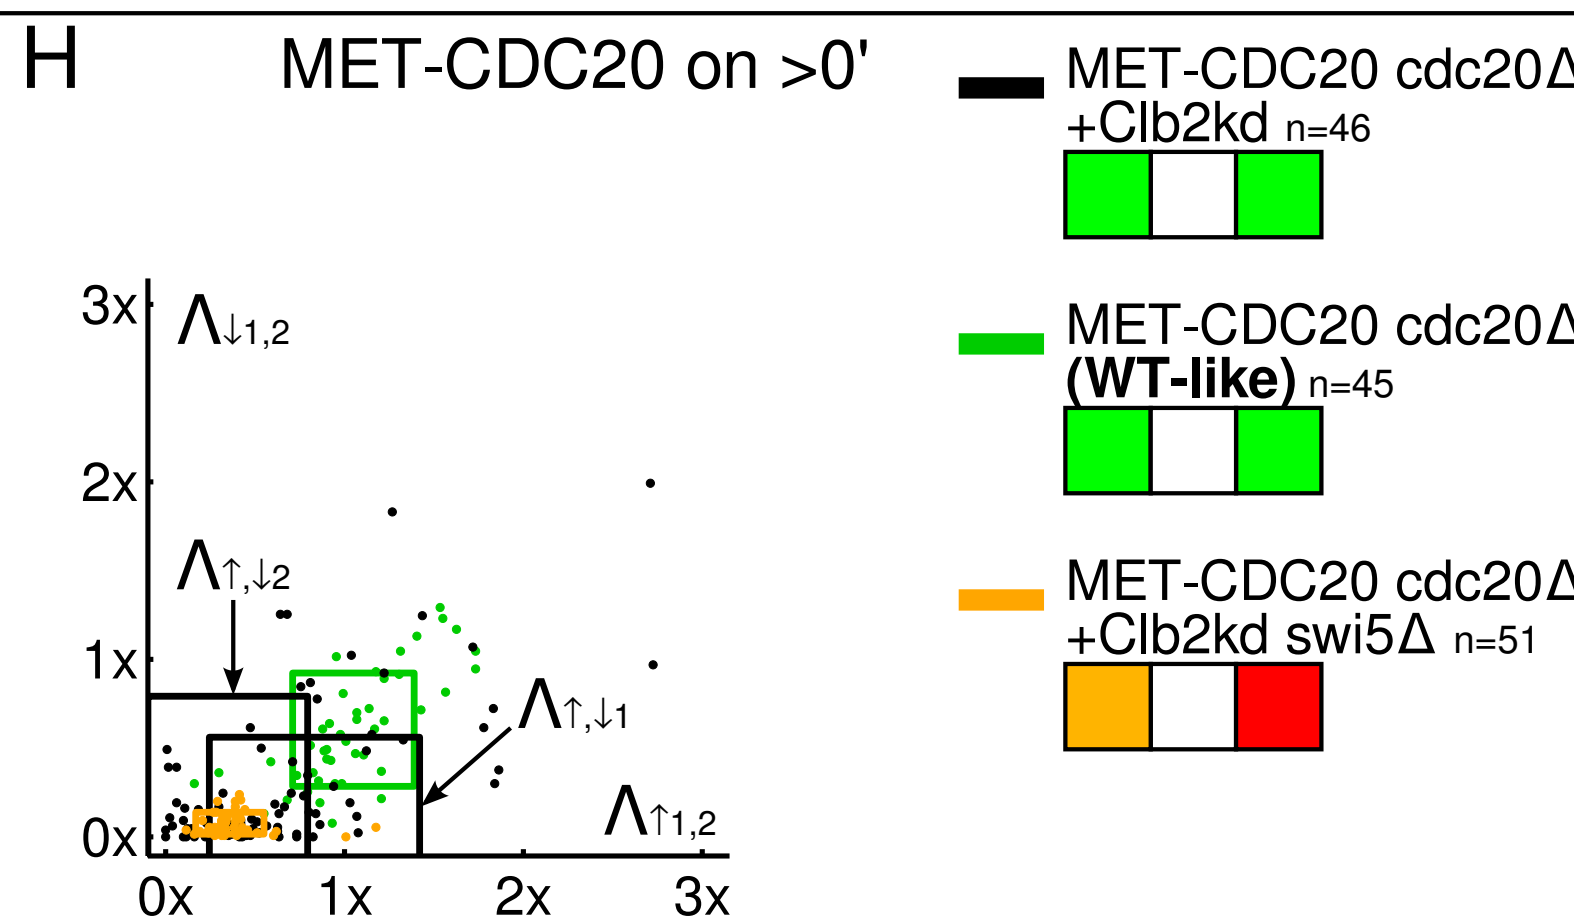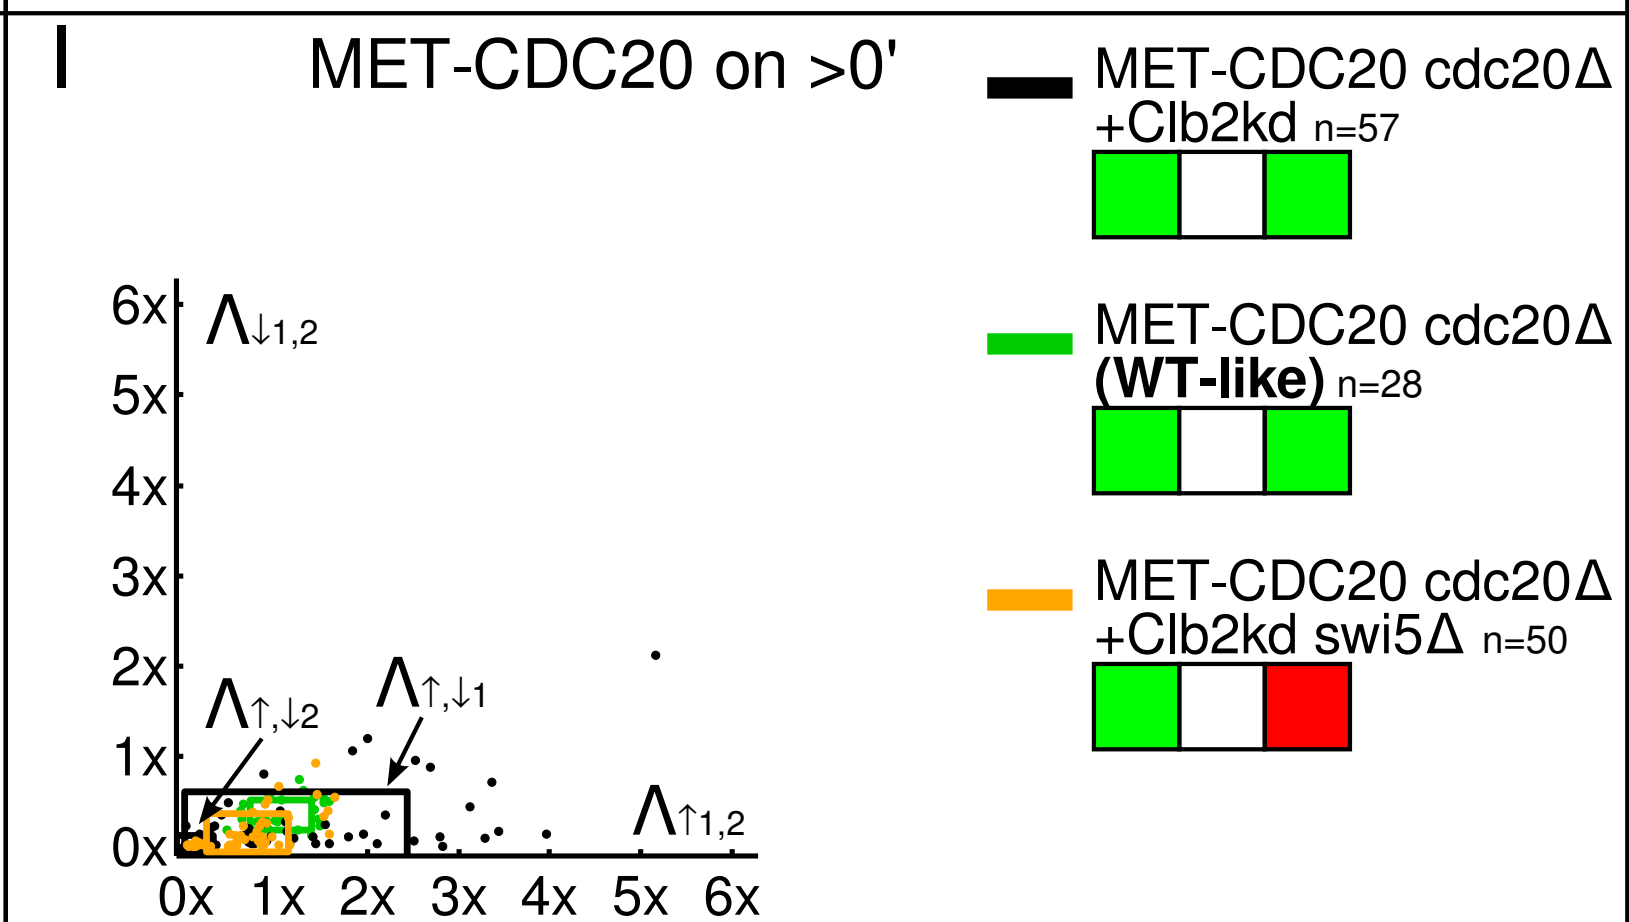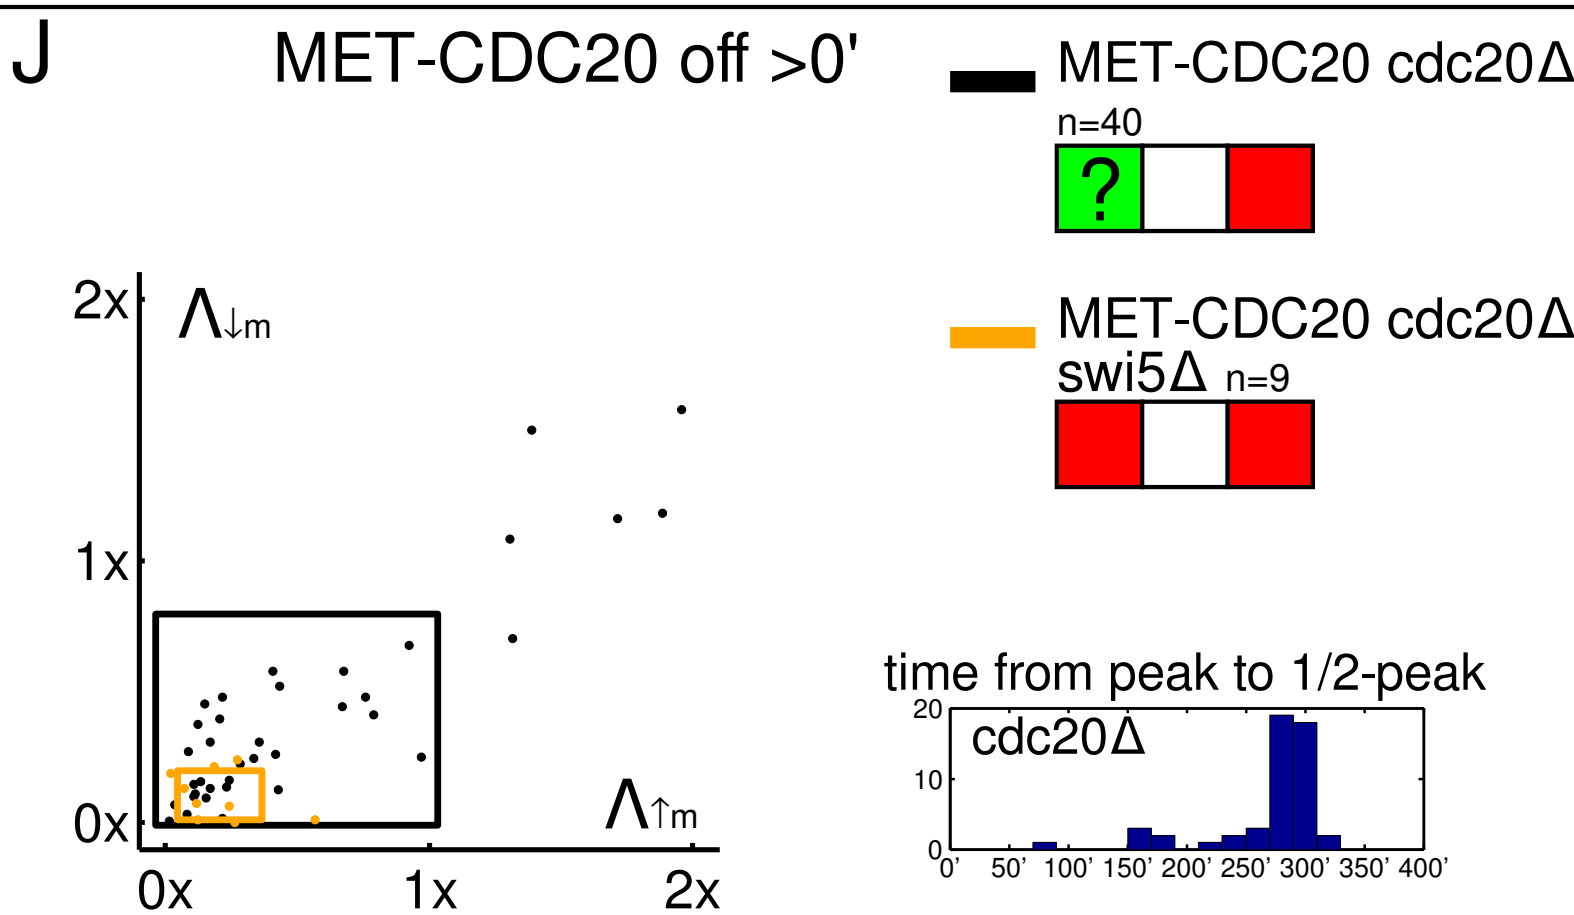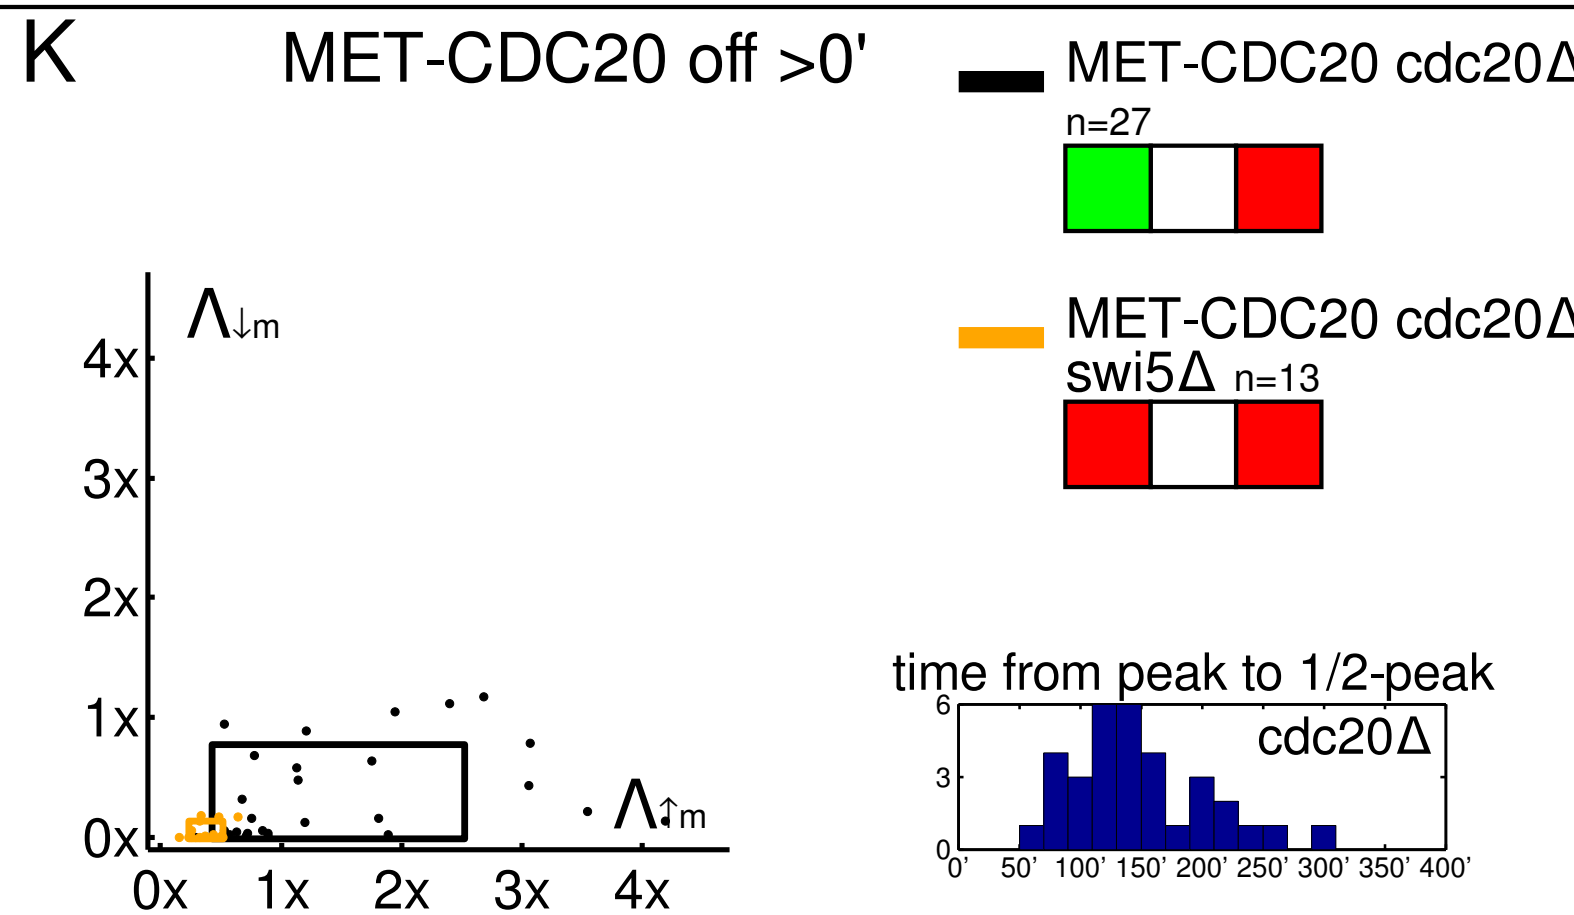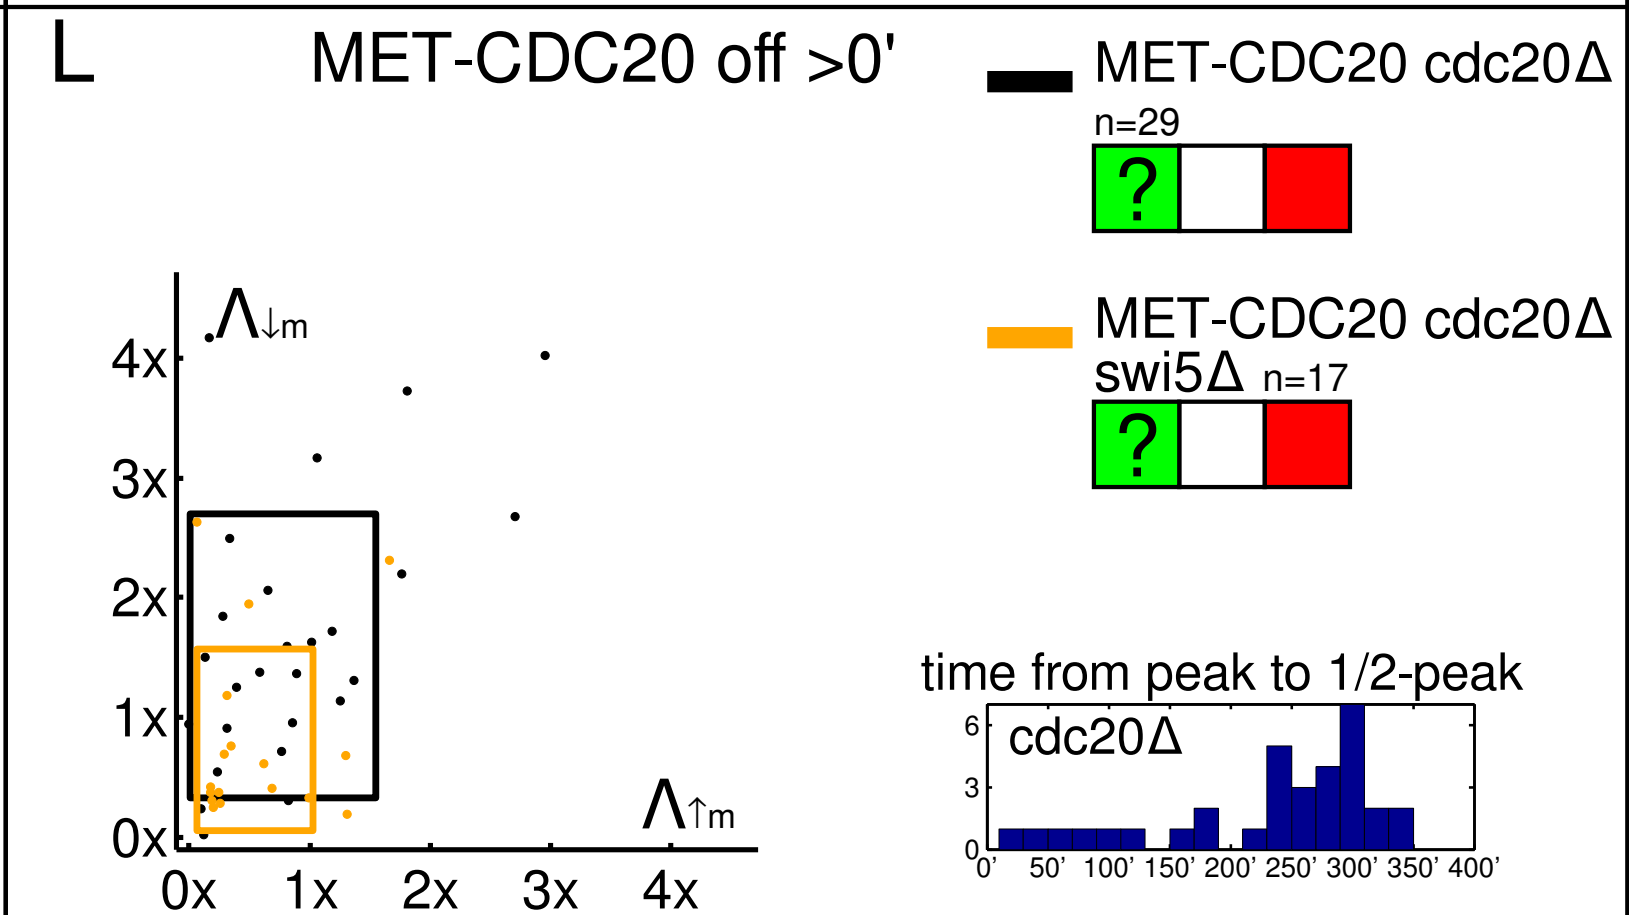

### SWI5-YFP

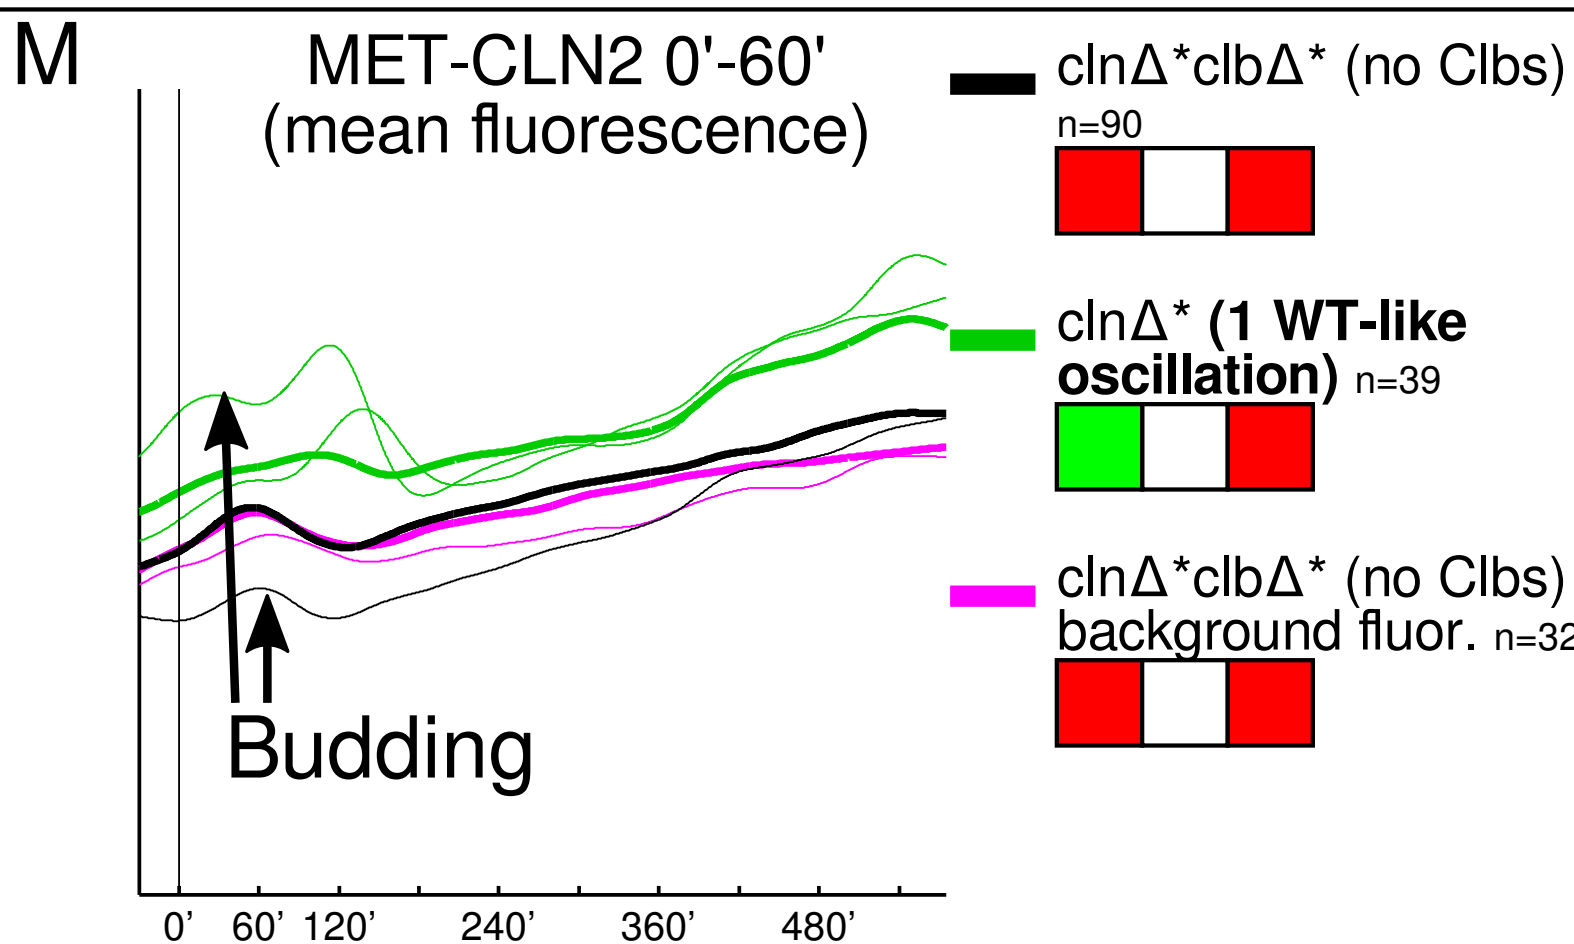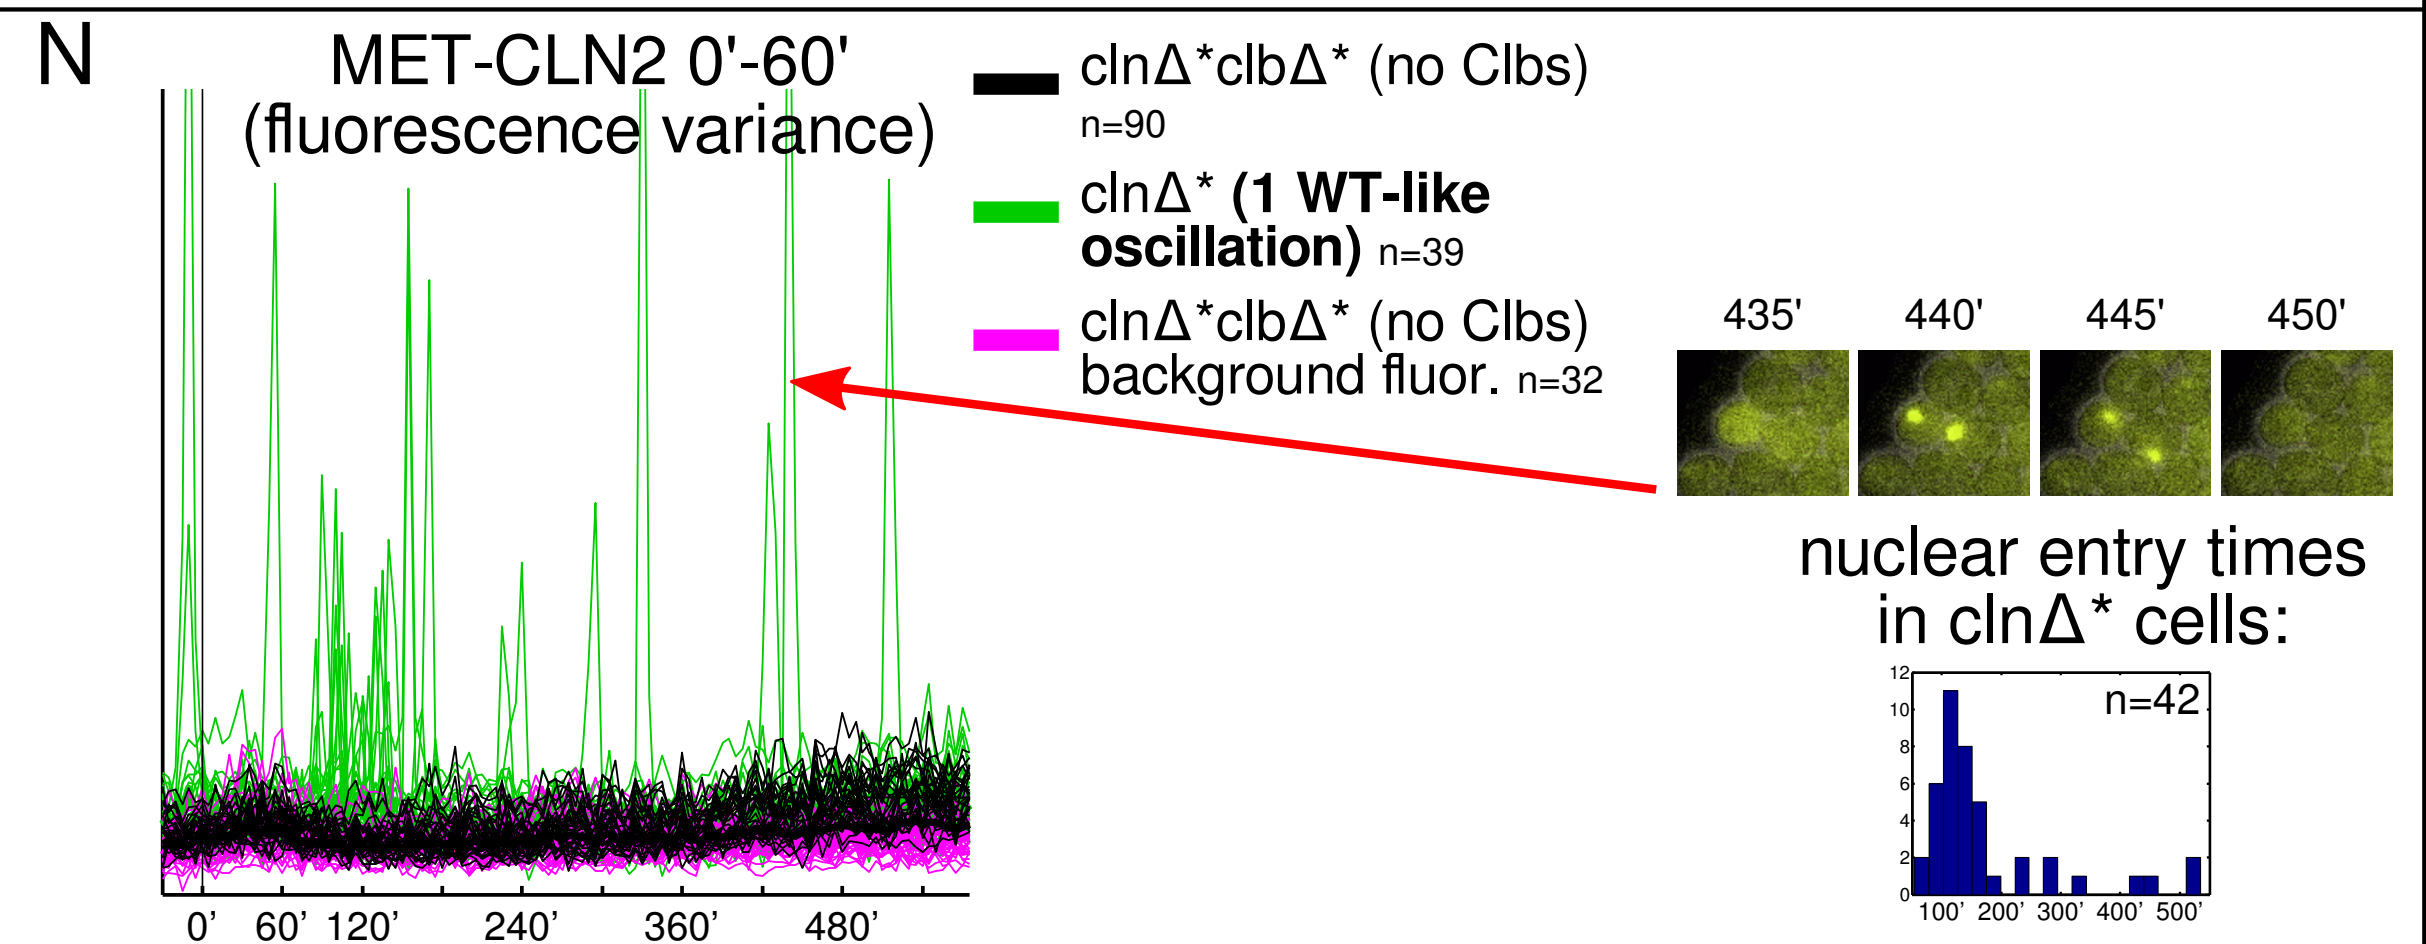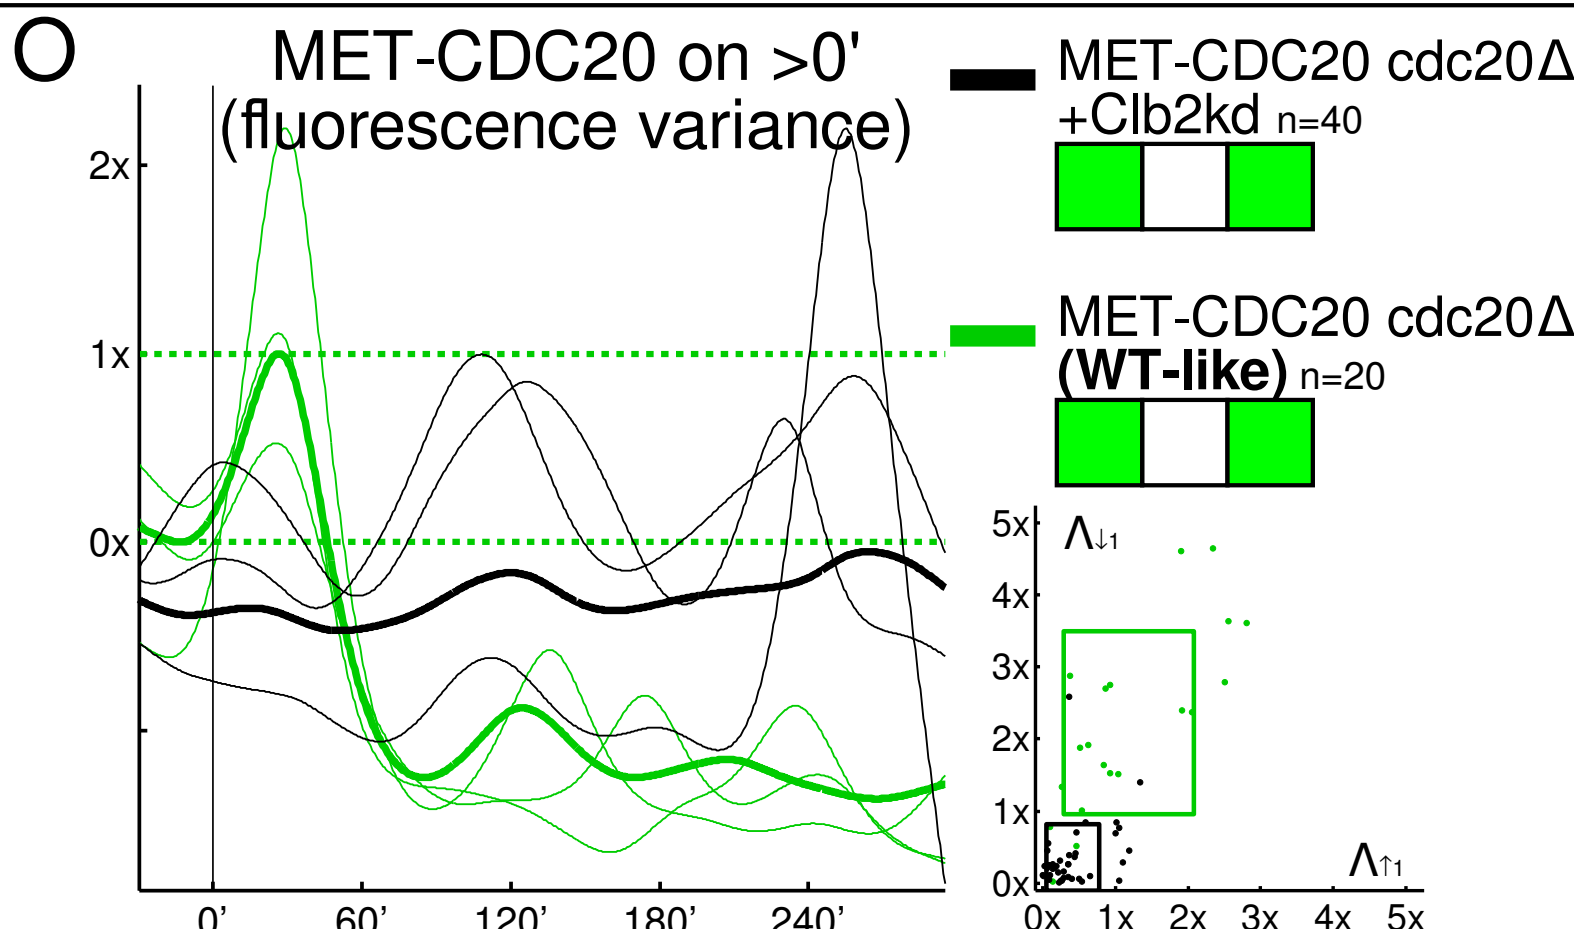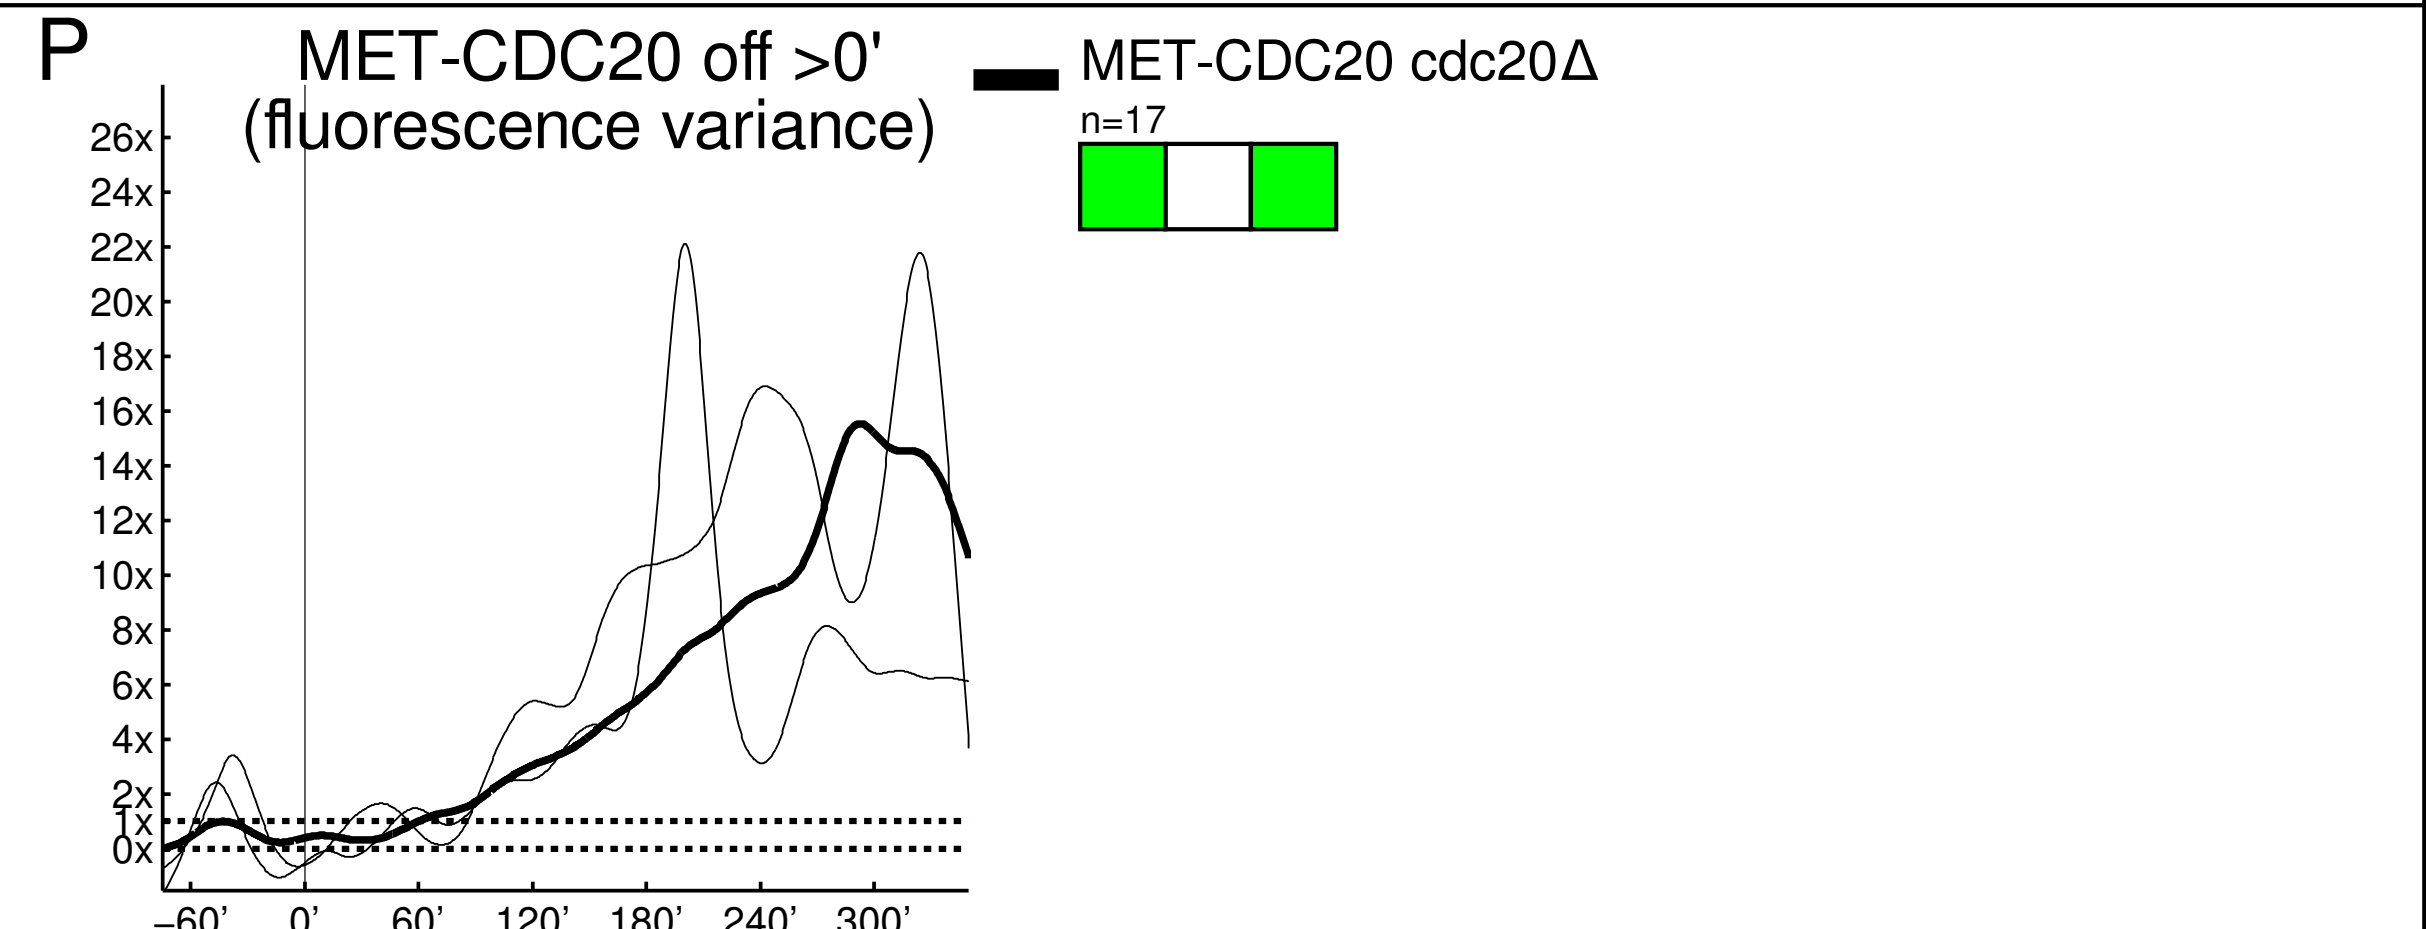

Supplement: NIHMS765458-supplement-4.pdf [file NIHMS765458-supplement-4.pdf]

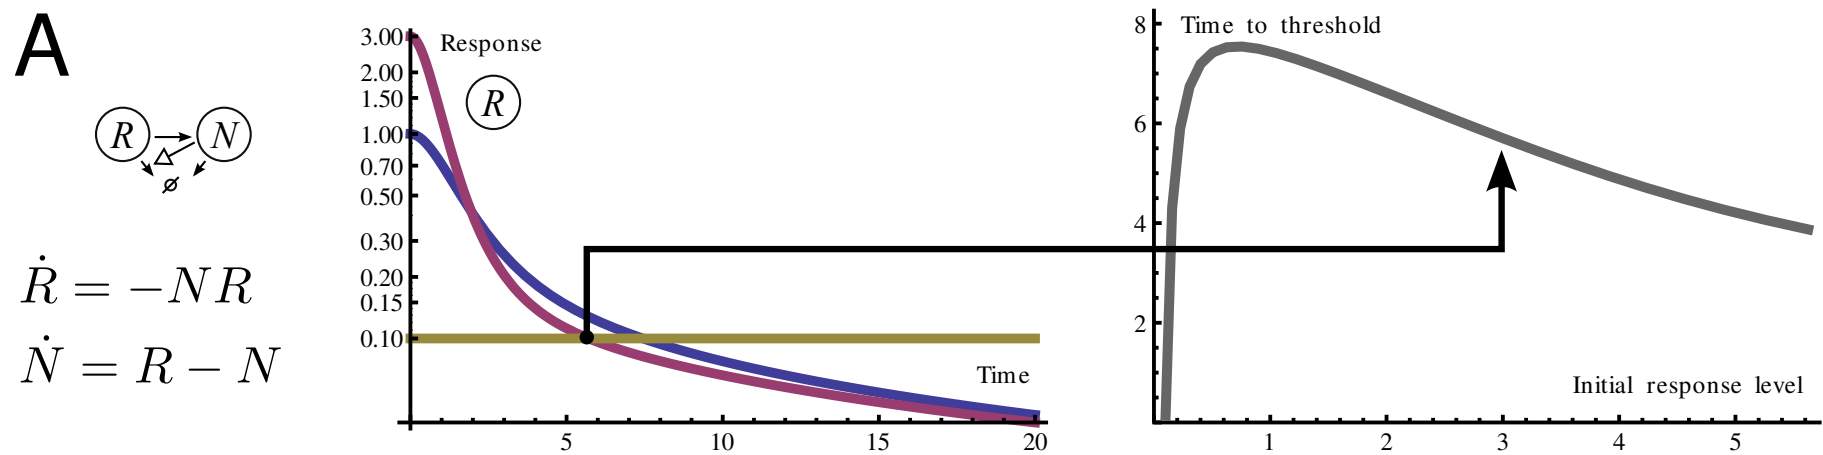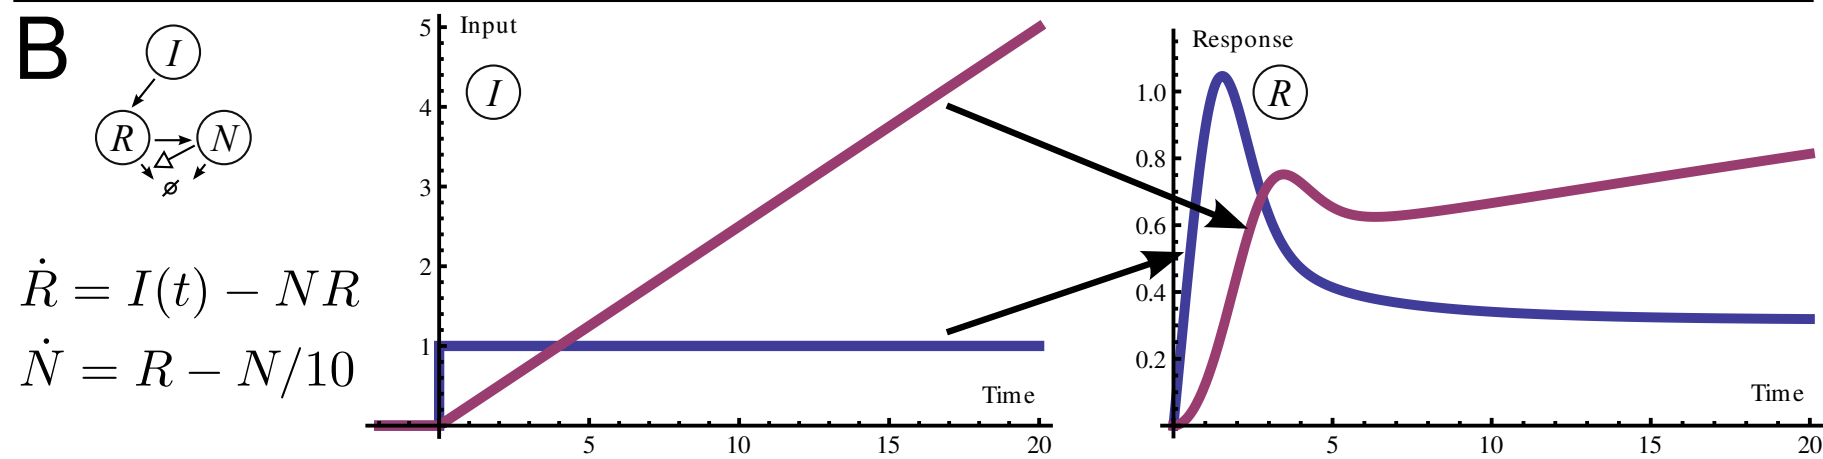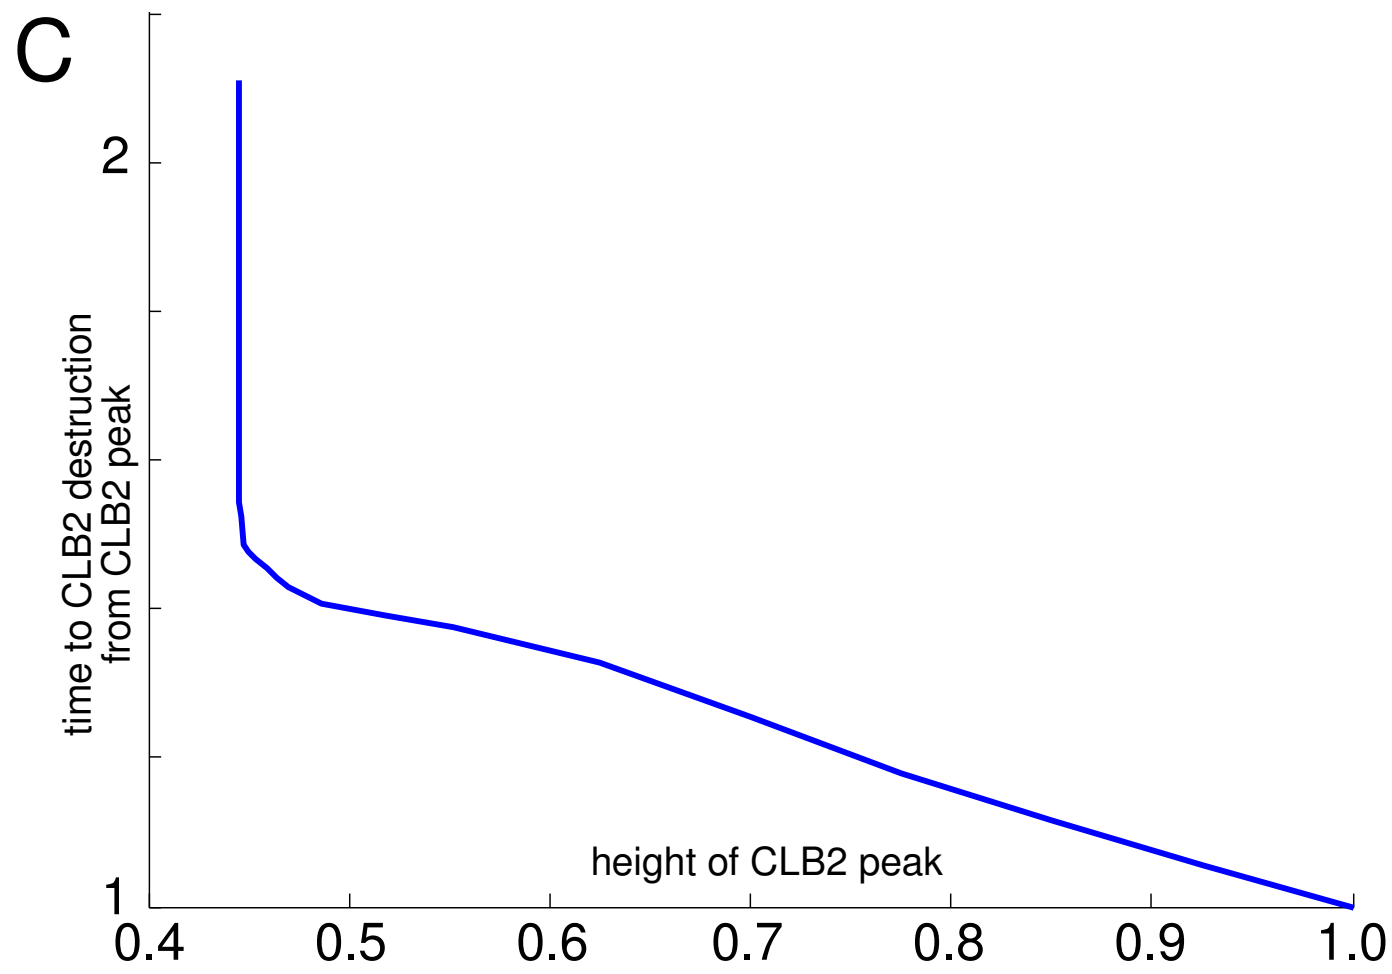

Supplement: NIHMS765458-supplement-5.pdf [file NIHMS765458-supplement-5.pdf]

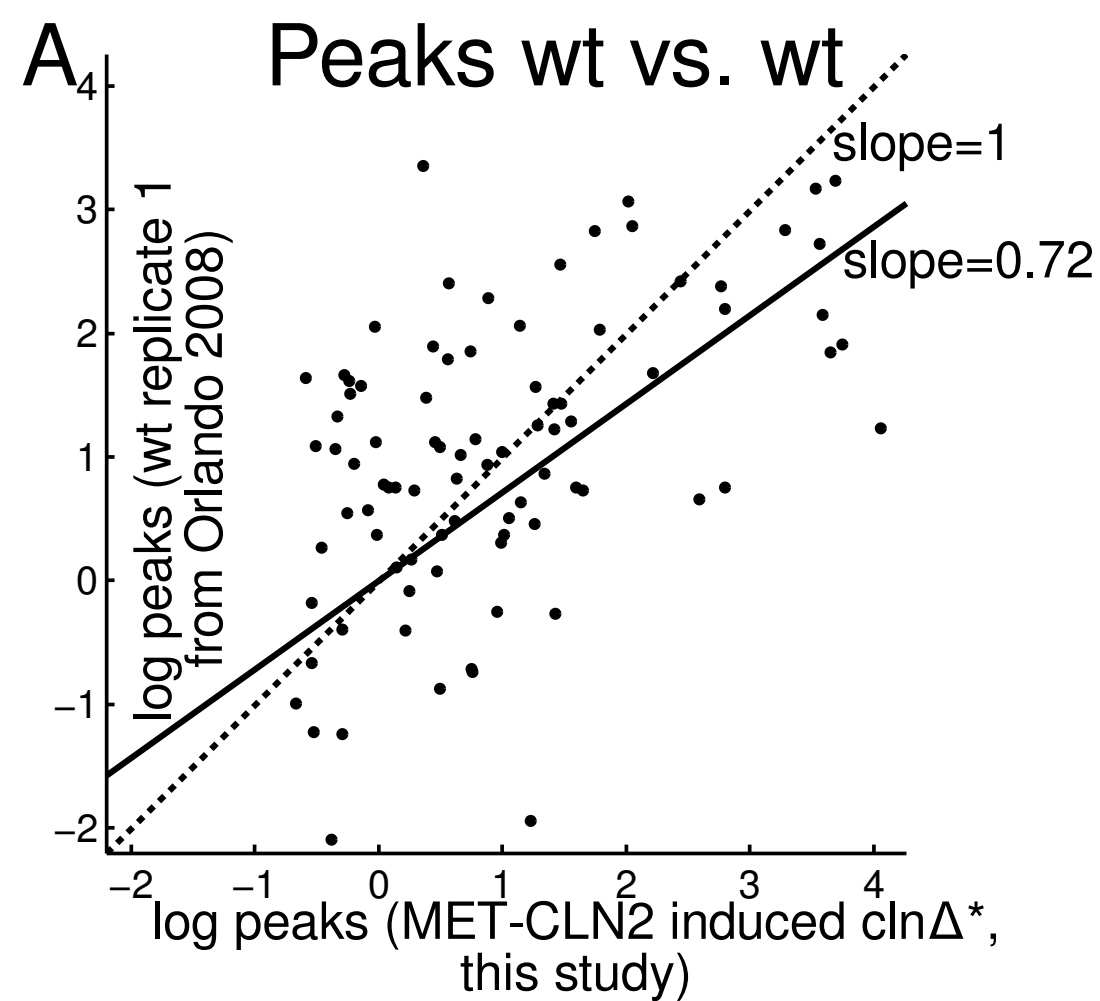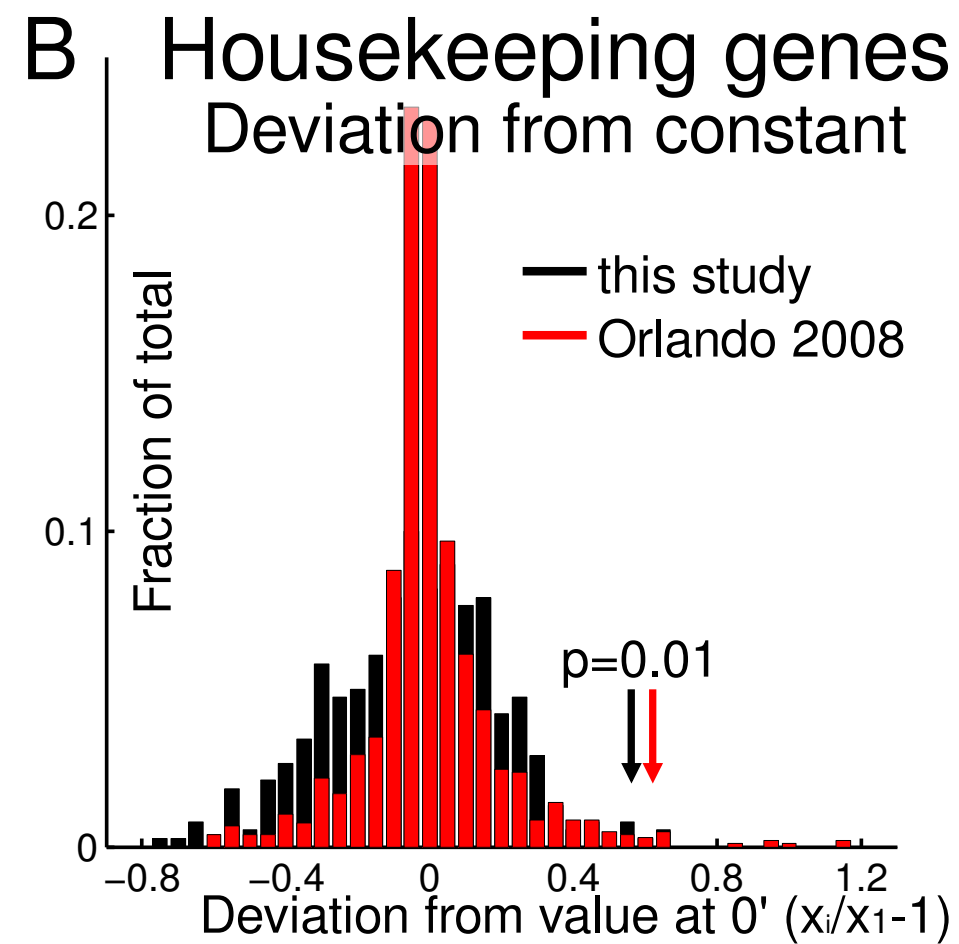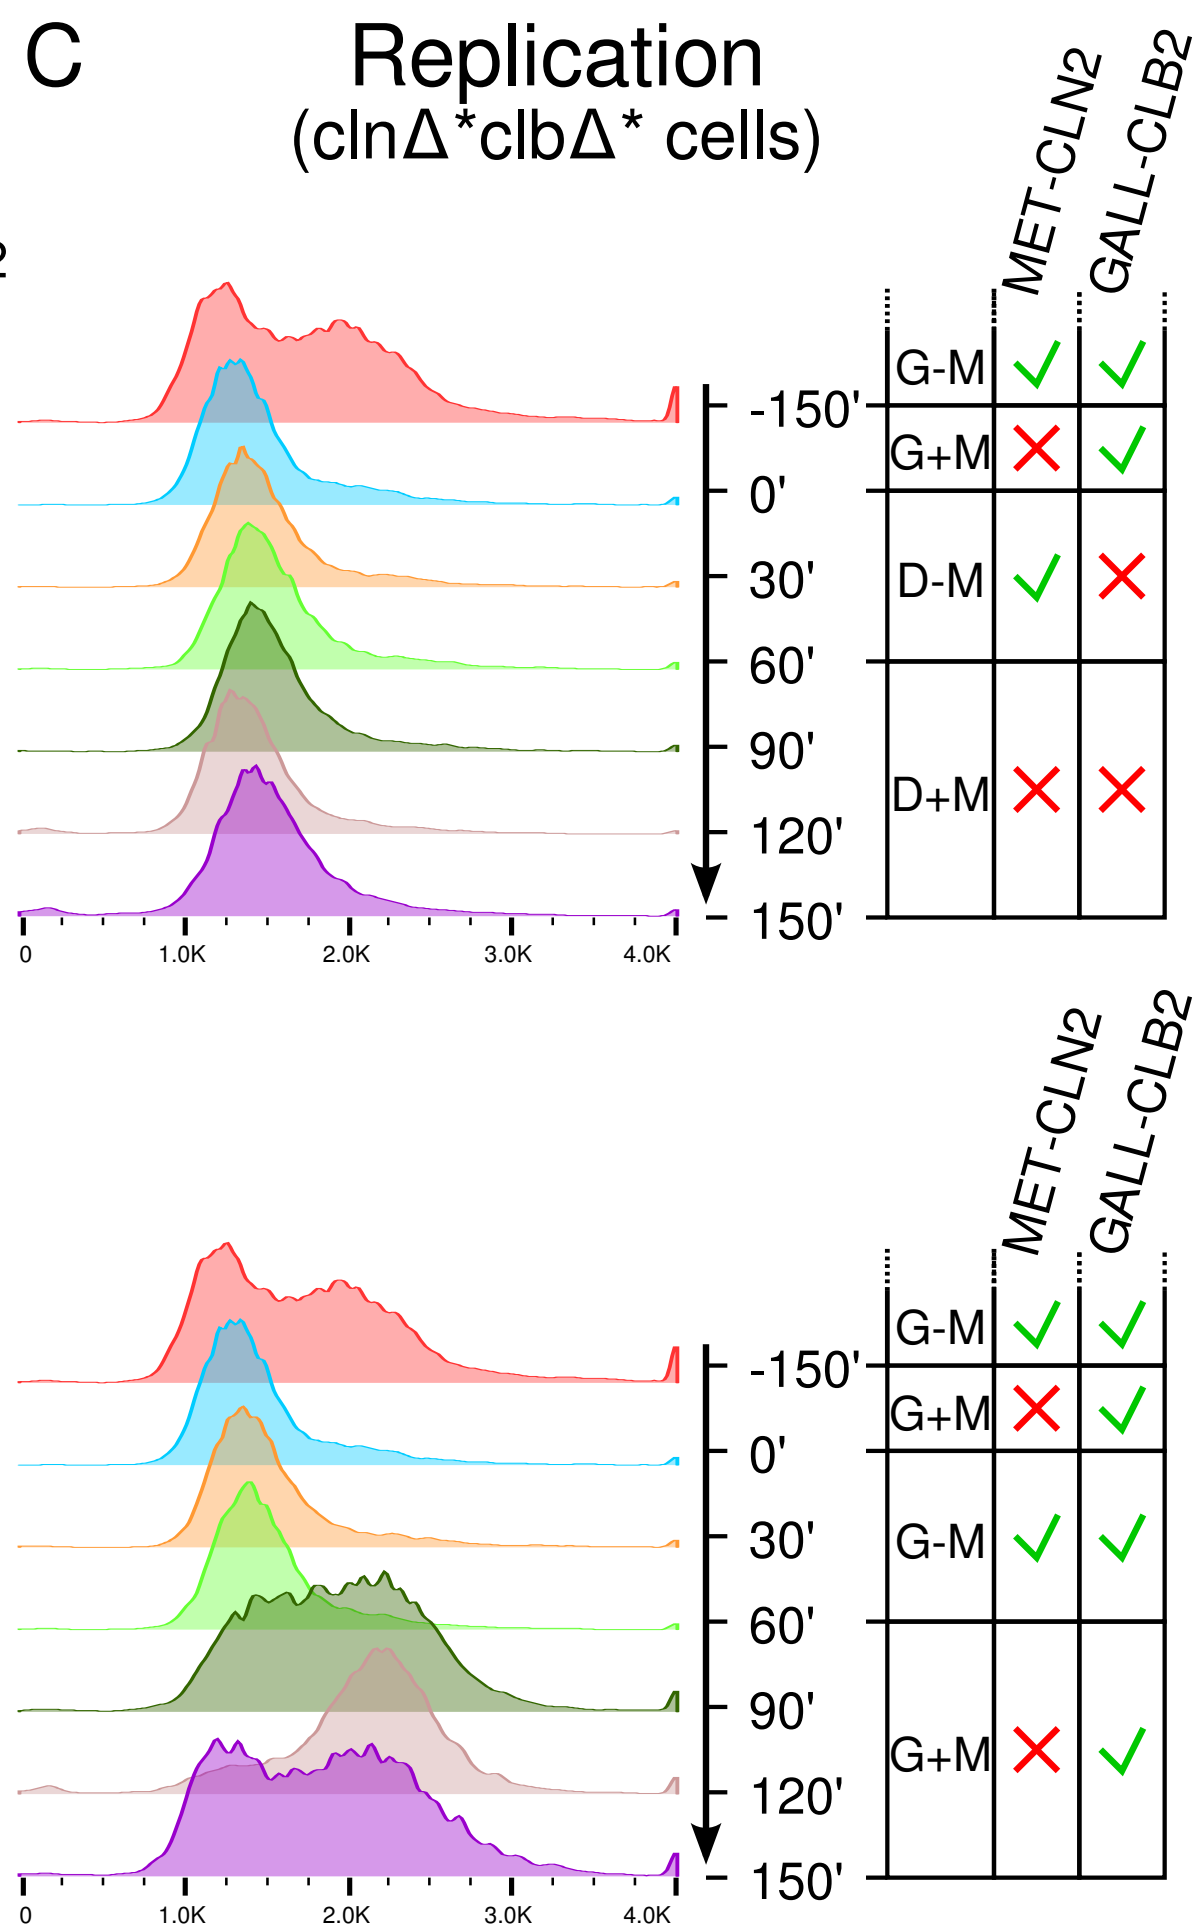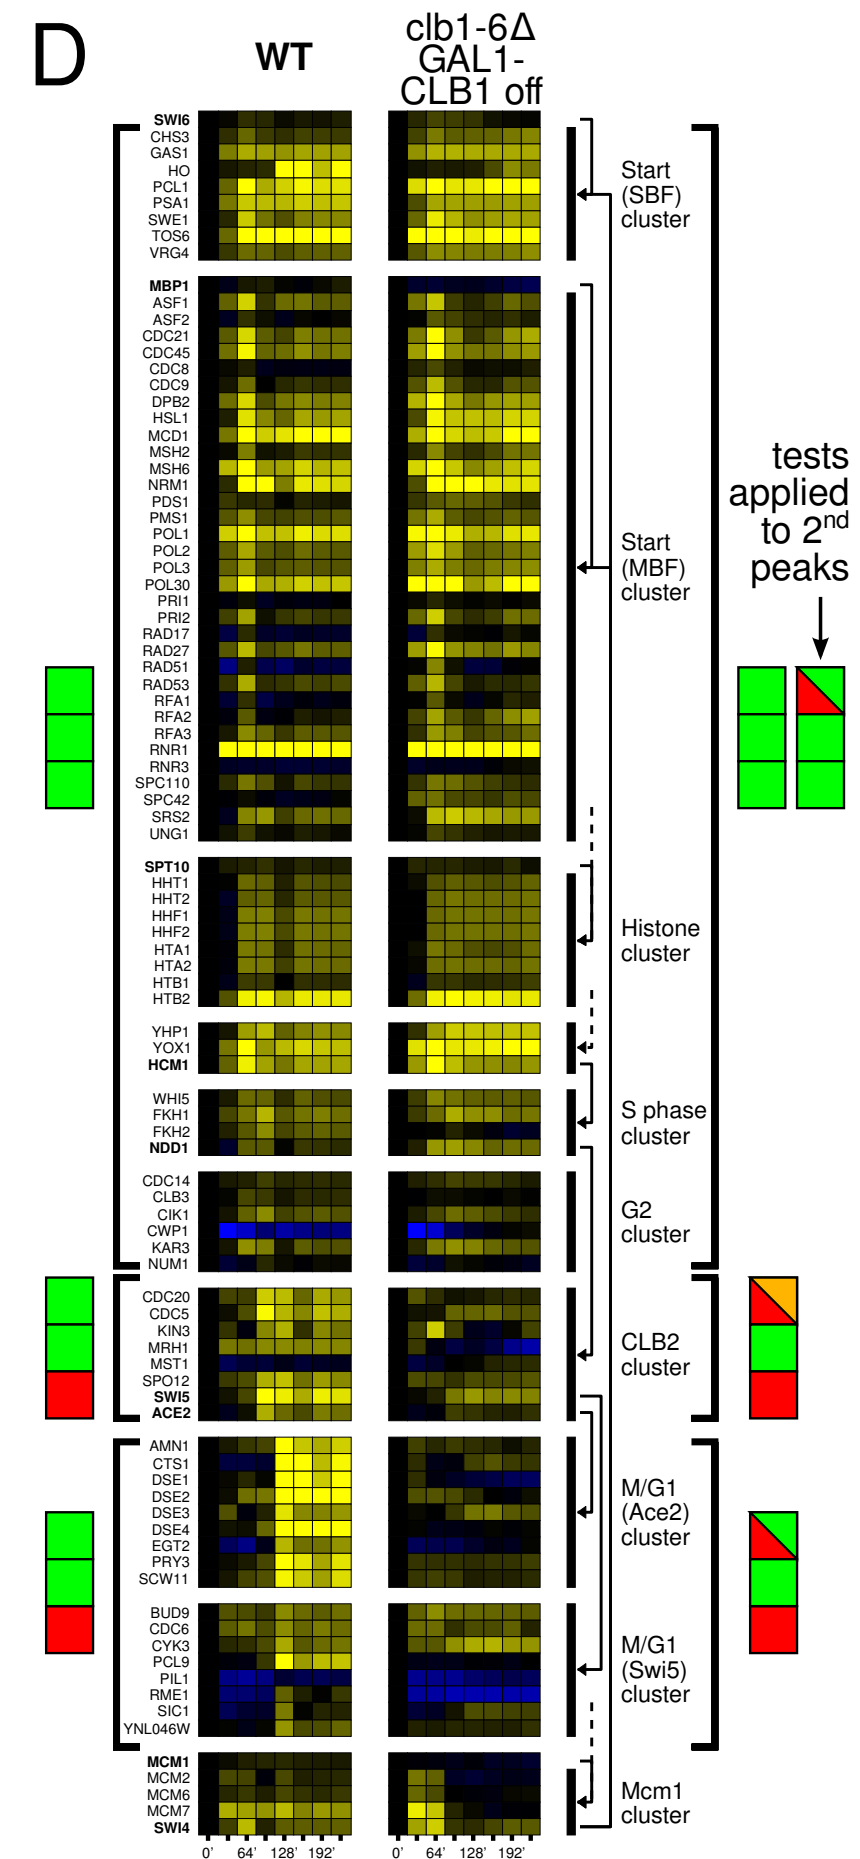

Supplement: NIHMS765458-supplement-6.pdf [file NIHMS765458-supplement-6.pdf]
